# Supplementary material for: Fermentation of Illigera aromatica with Clonostachys rogersoniana producing novel cytotoxic menthane-type monoterpenoid dimers
Source: Royal Society of Chemistry journal article supplement (doi:10.1039/c7ra06078e), 2017-01-01
Supplement: c7ra06078e1.pdf [file c7ra06078e1.pdf]

**Fermentation of *Illigera aromatica* with *Clonostachys rogersoniana* producing novel  
cytotoxic menthane-type monoterpenoid dimmers**

Jian-Wei Dong, Le Cai,\* Xue-Jiao Li, Rui-Feng Mei, Jia-Peng Wang, Ping Luo, Yan Shu,  
Zhong-Tao Ding\*

*Functional Molecules Analysis and Biotransformation key laboratory of Universities in  
Yunnan Province, School of Chemical Science and Technology, Yunnan University,  
Kunming 650091, P.R. China.*

**Supporting Information**

\* Corresponding authors.

E-mail addresses: [ztding@ynu.edu.cn](mailto:ztding@ynu.edu.cn) (Z.T. Ding); [caile@ynu.edu.cn](mailto:caile@ynu.edu.cn) (L. Cai).

\*\*\*\*\*

**Table of Content**

|                                                                                                                                |    |
|--------------------------------------------------------------------------------------------------------------------------------|----|
| Figure S1 HRESIMS spectrum of dimericilligerate E ( <b>1</b> ) .....                                                           | S3 |
| Figure S2 <sup>1</sup> H NMR spectrum (CDCl <sub>3</sub> , 600 MHz) of dimericilligerate E ( <b>1</b> ) .....                  | S3 |
| Figure S3 <sup>13</sup> C NMR and DEPT spectra (CDCl <sub>3</sub> , 150 MHz) of dimericilligerate E ( <b>1</b> ) .....         | S4 |
| Figure S4 <sup>1</sup> H- <sup>1</sup> H COSY spectrum (CDCl <sub>3</sub> , 600 MHz) of dimericilligerate E ( <b>1</b> ) ..... | S4 |
| Figure S5 HSQC spectrum (CDCl <sub>3</sub> , 600 MHz) of dimericilligerate E ( <b>1</b> ) .....                                | S5 |
| Figure S6 HMBC spectrum (CDCl <sub>3</sub> , 600 MHz) of dimericilligerate E ( <b>1</b> ) .....                                | S5 |
| Figure S7 ROESY spectrum (CDCl <sub>3</sub> , 600 MHz) of dimericilligerate E ( <b>1</b> ) .....                               | S6 |
| Figure S8 HRESIMS spectrum of <b>1a</b> .....                                                                                  | S6 |
| Figure S9 <sup>1</sup> H NMR spectrum (CDCl <sub>3</sub> , 400 MHz) of <b>1a</b> .....                                         | S7 |
| Figure S10 <sup>13</sup> C NMR and DEPT spectra (CDCl <sub>3</sub> , 100 MHz) of <b>1a</b> .....                               | S7 |
| Figure S11 <sup>1</sup> H- <sup>1</sup> H COSY spectrum (CDCl <sub>3</sub> , 400 MHz) of <b>1a</b> .....                       | S8 |
| Figure S12 HSQC spectrum (CDCl <sub>3</sub> , 400 MHz) of <b>1a</b> .....                                                      | S8 |

|                                                                                                                                     |     |
|-------------------------------------------------------------------------------------------------------------------------------------|-----|
| Figure S13 HMBC spectrum (CDCl <sub>3</sub> , 400 MHz) of <b>1a</b> .....                                                           | S9  |
| Figure S14 ROESY spectrum (CDCl <sub>3</sub> , 400 MHz) of <b>1a</b> .....                                                          | S9  |
| Figure S15 HRESIMS spectrum of ( <i>R</i> )-MTPA ester of <b>1a</b> .....                                                           | S10 |
| Figure S16 <sup>1</sup> H NMR spectrum (CDCl <sub>3</sub> , 400 MHz) of ( <i>R</i> )-MTPA ester of <b>1a</b> .....                  | S10 |
| Figure S17 <sup>1</sup> H- <sup>1</sup> H COSY spectrum (CDCl <sub>3</sub> , 400 MHz) of ( <i>R</i> )-MTPA ester of <b>1a</b> ..... | S11 |
| Figure S18 HSQC spectrum (CDCl <sub>3</sub> , 400 MHz) of ( <i>R</i> )-MTPA ester of <b>1a</b> .....                                | S11 |
| Figure S19 HRESIMS spectrum of ( <i>S</i> )-MTPA ester of <b>1a</b> .....                                                           | S12 |
| Figure S20 <sup>1</sup> H-NMR spectrum (CDCl <sub>3</sub> , 400 MHz) of ( <i>S</i> )-MTPA ester of <b>1a</b> .....                  | S12 |
| Figure S21 <sup>1</sup> H- <sup>1</sup> H COSY spectrum (CDCl <sub>3</sub> , 400 MHz) of ( <i>S</i> )-MTPA ester of <b>1a</b> ..... | S13 |
| Figure S22 ROESY spectrum (CDCl <sub>3</sub> , 400 MHz) of ( <i>S</i> )-MTPA ester of <b>1a</b> .....                               | S13 |
| Figure S23 HRESIMS spectrum of dimericilligerate F ( <b>2</b> ).....                                                                | S14 |
| Figure S24 <sup>1</sup> H-NMR spectrum (CDCl <sub>3</sub> , 600 MHz) of dimericilligerate F ( <b>2</b> ).....                       | S14 |
| Figure S25 <sup>13</sup> C-NMR and DEPT spectra (CDCl <sub>3</sub> , 150 MHz) of dimericilligerate F ( <b>2</b> )                   | S15 |
| Figure S26 <sup>1</sup> H- <sup>1</sup> H COSY spectrum (CDCl <sub>3</sub> , 600 MHz) of dimericilligerate F ( <b>2</b> ).....      | S15 |
| Figure S27 HSQC spectrum (CDCl <sub>3</sub> , 600 MHz) of dimericilligerate F ( <b>2</b> ).....                                     | S16 |
| Figure S28 HMBC spectrum (CDCl <sub>3</sub> , 600 MHz) of dimericilligerate F ( <b>2</b> ).....                                     | S16 |
| Figure S29 NOESY spectrum (CDCl <sub>3</sub> , 600 MHz) of dimericilligerate F ( <b>2</b> ).....                                    | S17 |
| Figure S30 HRESIMS spectrum of dimericilligerate A ( <b>3</b> ).....                                                                | S17 |
| Figure S31 <sup>1</sup> H NMR spectrum (CDCl <sub>3</sub> , 400 MHz) of dimericilligerate A ( <b>3</b> ).....                       | S18 |
| Figure S32 <sup>13</sup> C NMR and DEPT spectra (CDCl <sub>3</sub> , 100 MHz) of dimericilligerate A ( <b>3</b> )                   | S18 |
| Figure S33 <sup>1</sup> H- <sup>1</sup> H COSY spectrum (CDCl <sub>3</sub> , 400 MHz) of dimericilligerate A ( <b>3</b> ).....      | S19 |
| Figure S34 HSQC spectrum (CDCl <sub>3</sub> , 400 MHz) of dimericilligerate A ( <b>3</b> ).....                                     | S19 |
| Figure S35 HMBC spectrum (CDCl <sub>3</sub> , 400 MHz) of dimericilligerate A ( <b>3</b> ).....                                     | S20 |
| Figure S36 ROESY spectrum (CDCl <sub>3</sub> , 400 MHz) of dimericilligerate A ( <b>3</b> ).....                                    | S20 |
| Figure S37 HRESIMS spectrum of dimericilligerate B ( <b>4</b> ).....                                                                | S21 |
| Figure S38 <sup>1</sup> H NMR spectrum (CDCl <sub>3</sub> , 600 MHz) of dimericilligerate B ( <b>4</b> ).....                       | S21 |
| Figure S39 <sup>13</sup> C NMR and DEPT spectra (CDCl <sub>3</sub> , 150 MHz) of dimericilligerate B ( <b>4</b> )                   | S22 |
| Figure S40 <sup>1</sup> H- <sup>1</sup> H COSY spectrum (CDCl <sub>3</sub> , 600 MHz) of dimericilligerate B ( <b>4</b> ).....      | S22 |
| Figure S41 HSQC spectrum (CDCl <sub>3</sub> , 600 MHz) of dimericilligerate B ( <b>4</b> ).....                                     | S23 |
| Figure S42 HMBC spectrum (CDCl <sub>3</sub> , 600 MHz) of dimericilligerate B ( <b>4</b> ).....                                     | S23 |
| Figure S43 ROESY spectrum (CDCl <sub>3</sub> , 600 MHz) of dimericilligerate B ( <b>4</b> ).....                                    | S24 |
| Figure S44 HRESIMS spectrum of dimericilligerate C ( <b>5</b> ).....                                                                | S24 |
| Figure S45 <sup>1</sup> H NMR spectrum (CDCl <sub>3</sub> , 600 MHz) of dimericilligerate C ( <b>5</b> ).....                       | S25 |
| Figure S46 <sup>13</sup> C NMR and DEPT spectra (CDCl <sub>3</sub> , 150 MHz) of dimericilligerate C ( <b>5</b> )                   | S25 |
| Figure S47 <sup>1</sup> H- <sup>1</sup> H COSY spectrum (CDCl <sub>3</sub> , 600 MHz) of dimericilligerate C ( <b>5</b> ).....      | S26 |
| Figure S48 HSQC spectrum (CDCl <sub>3</sub> , 600 MHz) of dimericilligerate C ( <b>5</b> ).....                                     | S26 |
| Figure S49 HMBC spectrum (CDCl <sub>3</sub> , 600 MHz) of dimericilligerate C ( <b>5</b> ).....                                     | S27 |
| Figure S50 ROESY spectrum (CDCl <sub>3</sub> , 600 MHz) of dimericilligerate C ( <b>5</b> ).....                                    | S27 |
| Figure S51 <sup>13</sup> C NMR spectrum (acetone- <i>d</i> <sub>6</sub> , 150 MHz) of dimericilligerate C ( <b>5</b> ).....         | S28 |
| Figure S52 Total ion chromatogram (ESI-) of the petroleum ether extract.....                                                        | S28 |

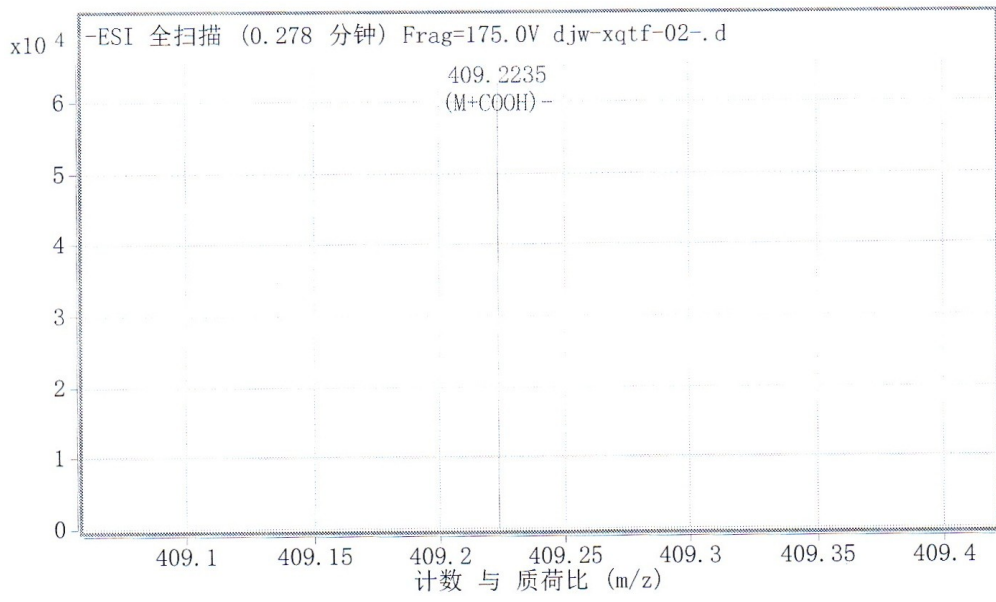

**Figure S1 HRESIMS spectrum of dimericilligerate E (1)**

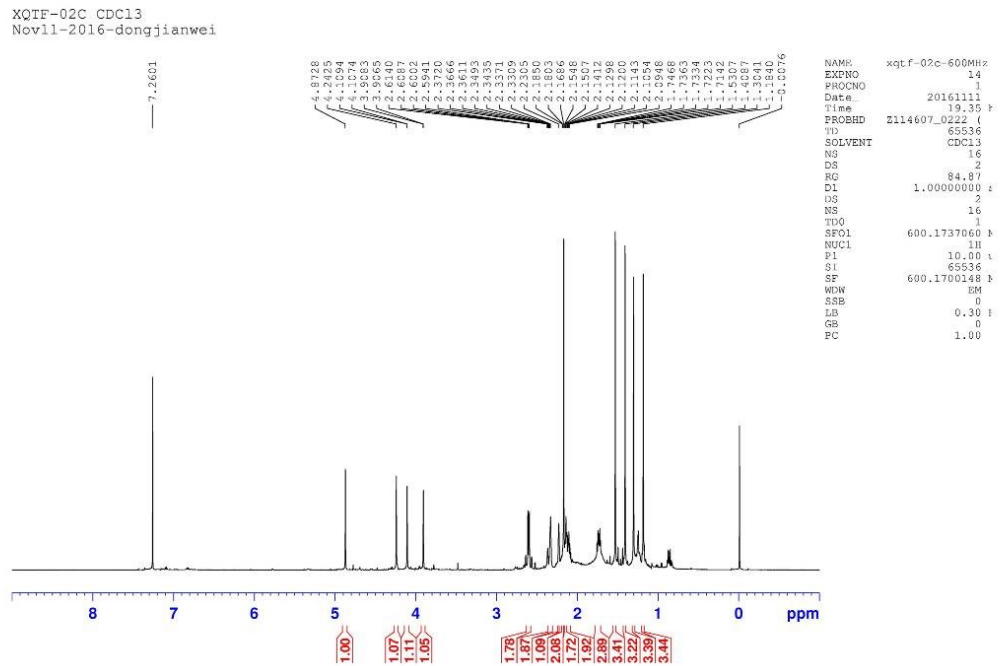

**Figure S2 <sup>1</sup>H NMR spectrum (CDCl<sub>3</sub>, 600 MHz) of dimericilligerate E (1)**

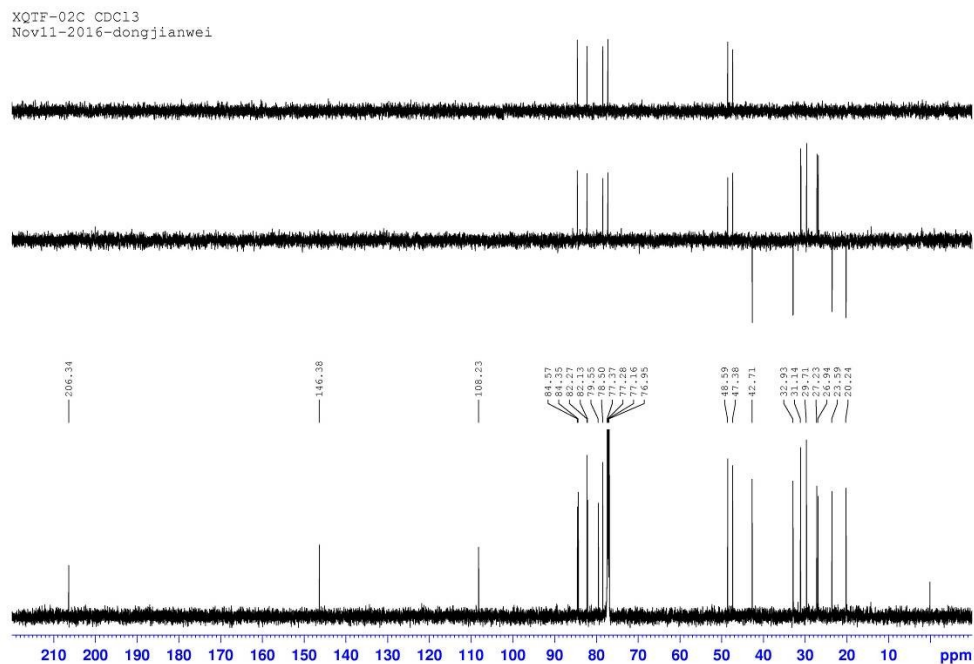

Figure S3  $^{13}\text{C}$  NMR and DEPT spectra ( $\text{CDCl}_3$ , 150 MHz) of dimericilligerate E (1)

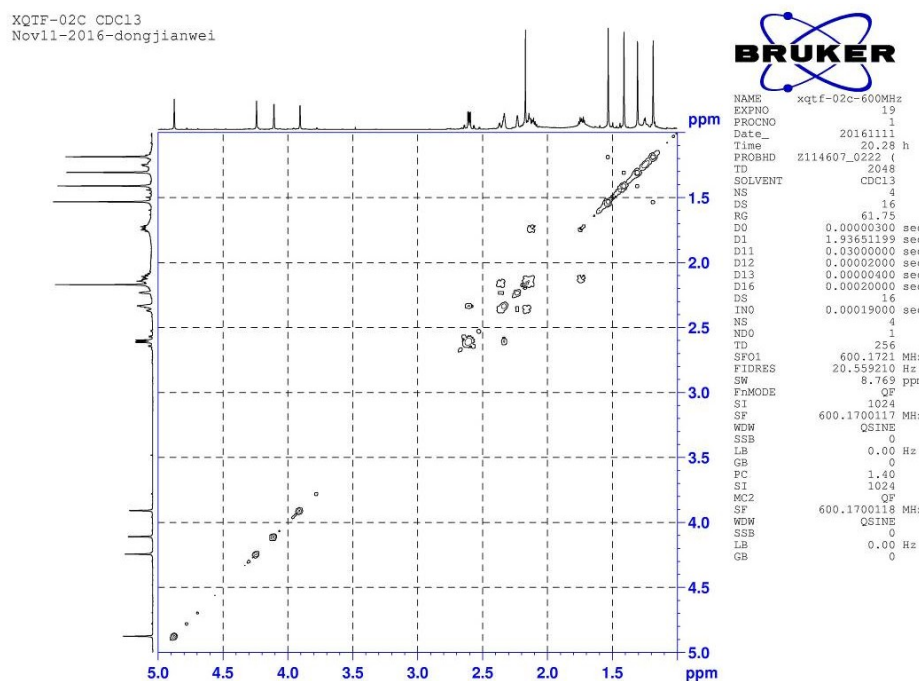

Figure S4  $^1\text{H}$ - $^1\text{H}$  COSY spectrum ( $\text{CDCl}_3$ , 600 MHz) of dimericilligerate E (1)

XQTF-02C CDCl3  
Nov11-2016-dongjianwei

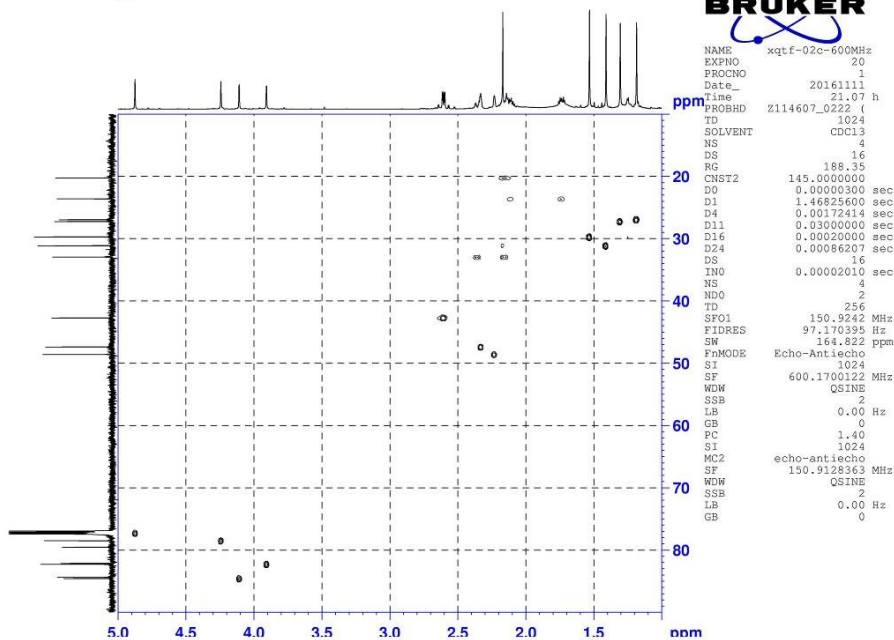

Figure S5 HSQC spectrum (CDCl<sub>3</sub>, 600 MHz) of dimericilligerate E (1)

XQTF-02C CDCl3  
Nov11-2016-dongjianwei

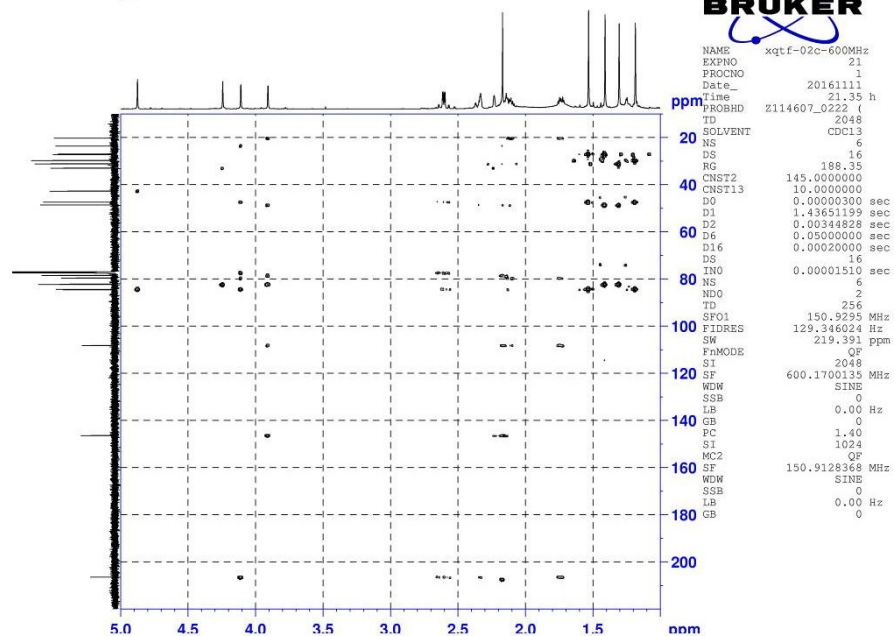

Figure S6 HMBC spectrum (CDCl<sub>3</sub>, 600 MHz) of dimericilligerate E (1)

XQTF-02C CDCl3  
Nov11-2016-dongjianwei

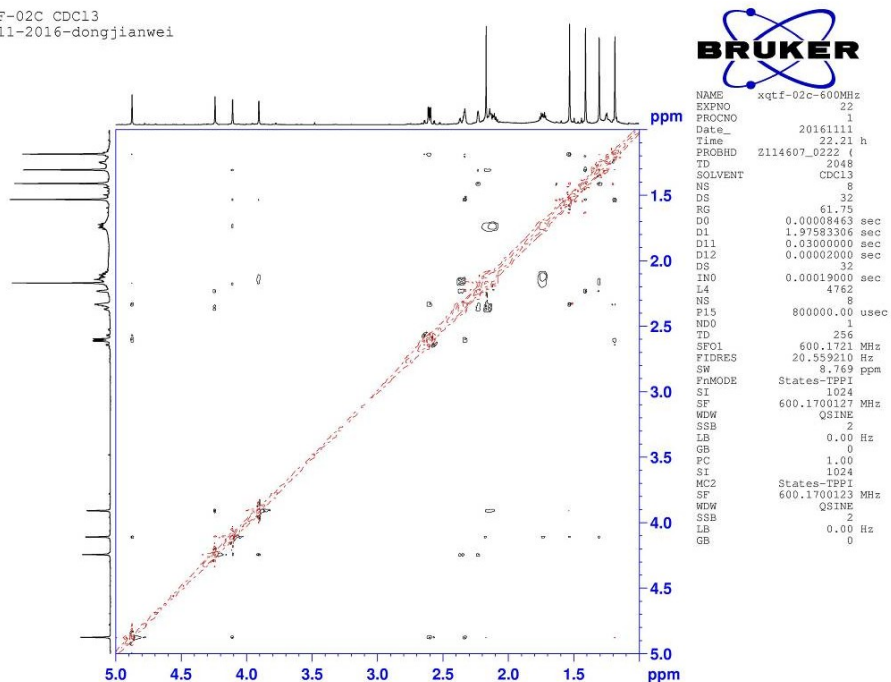

Figure S7 ROESY spectrum (CDCl<sub>3</sub>, 600 MHz) of dimericilligerate E (1)

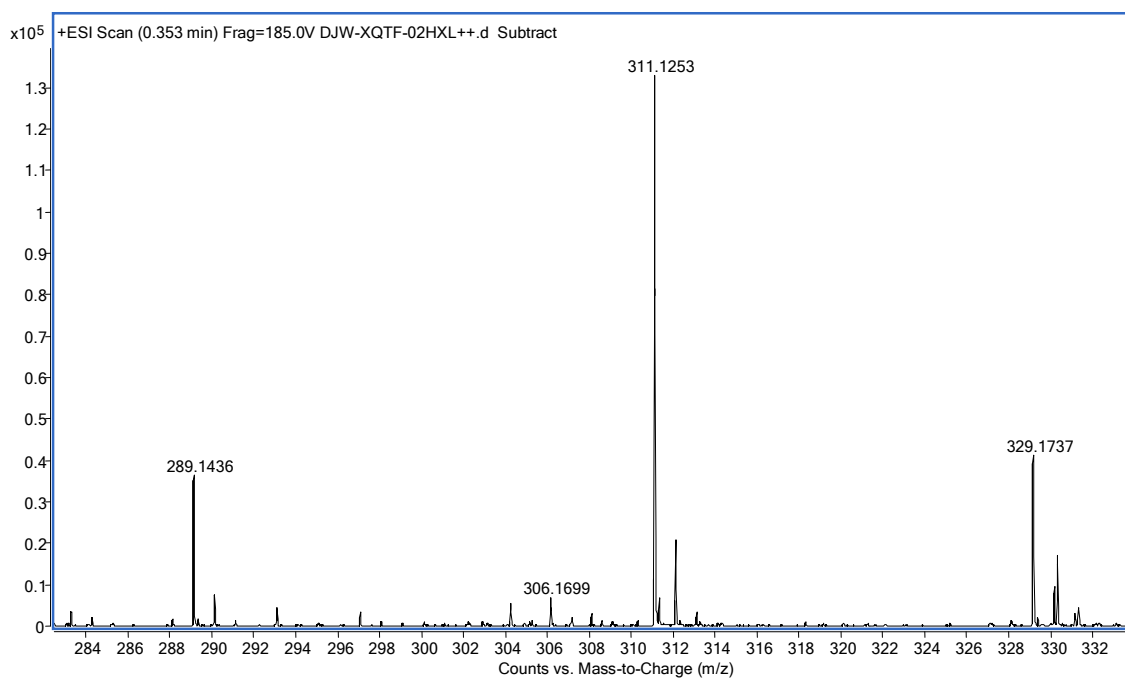

Figure S8 HRESIMS spectrum of 1a

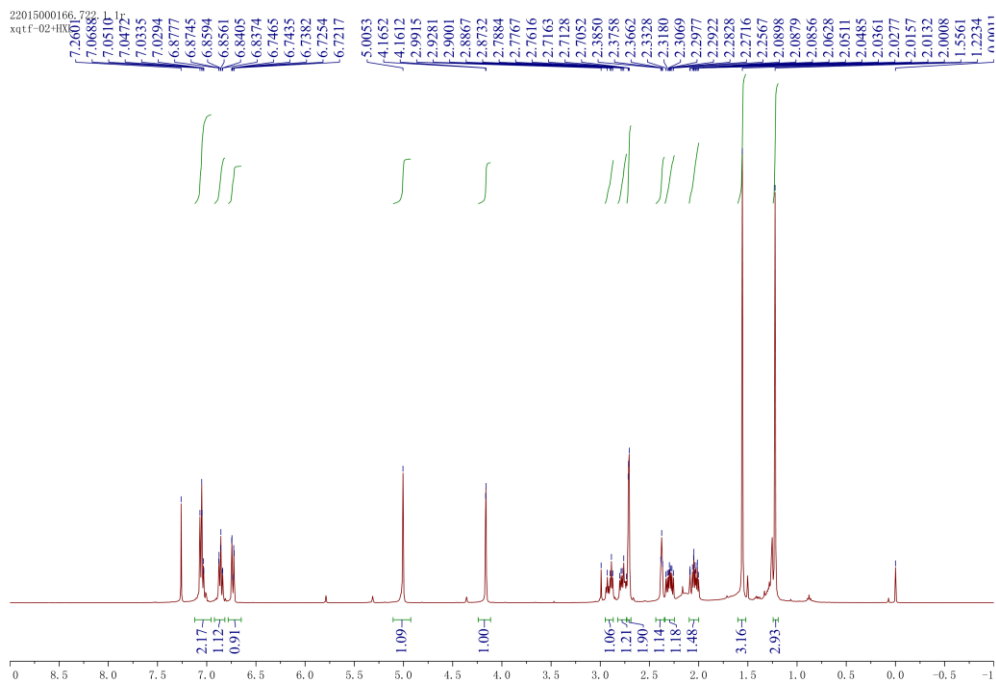

Figure S9  $^1\text{H}$  NMR spectrum ( $\text{CDCl}_3$ , 400 MHz) of **1a**

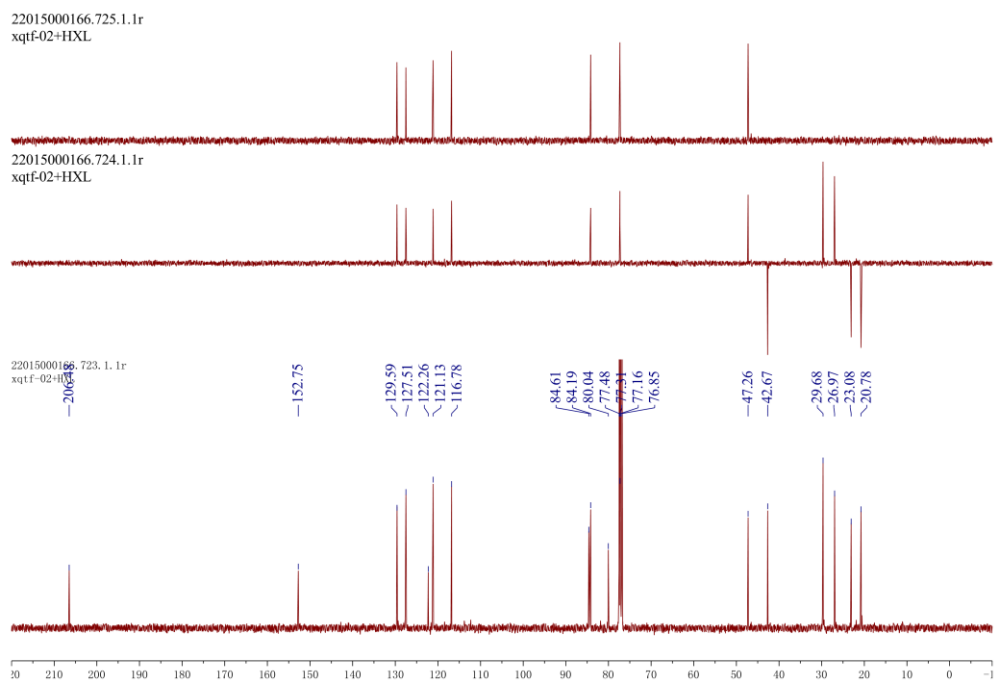

Figure S10  $^{13}\text{C}$  NMR and DEPT spectra ( $\text{CDCl}_3$ , 100 MHz) of **1a**

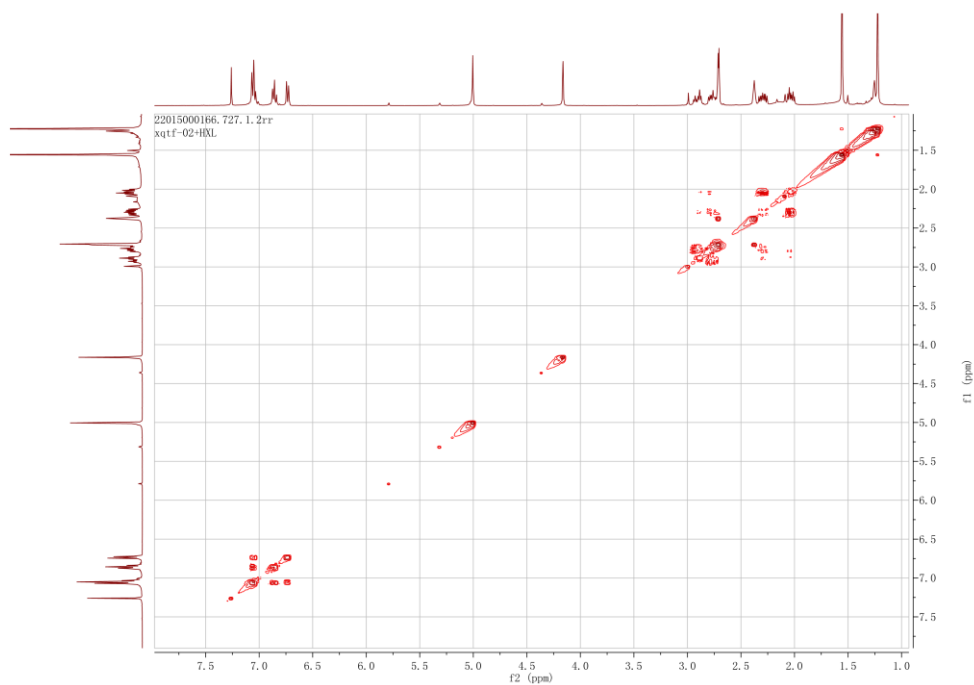

Figure S11  $^1\text{H}$ - $^1\text{H}$  COSY spectrum ( $\text{CDCl}_3$ , 400 MHz) of 1a

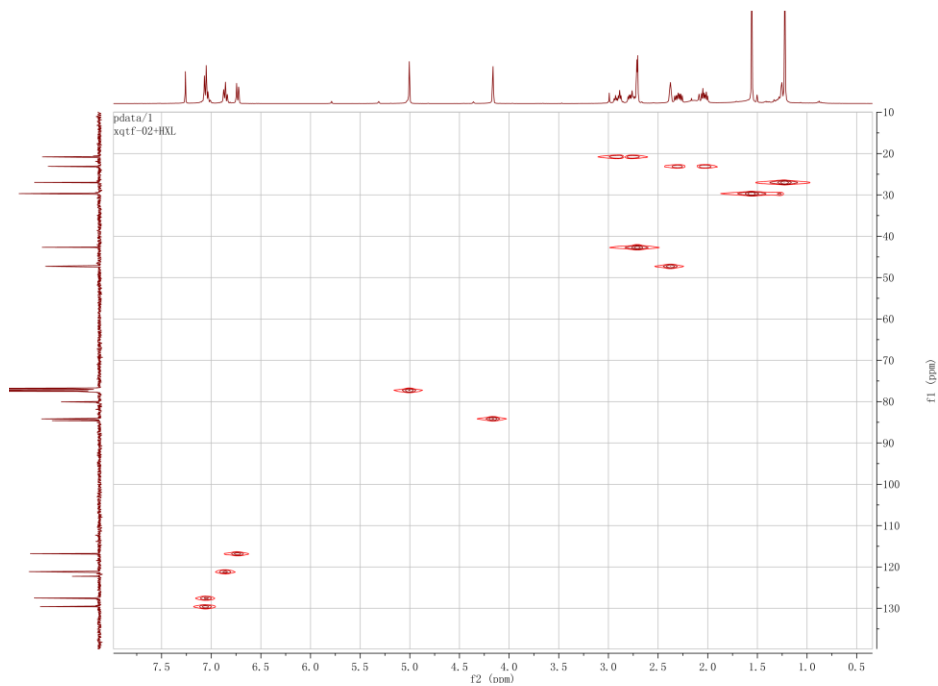

Figure S12 HSQC spectrum ( $\text{CDCl}_3$ , 400 MHz) of 1a



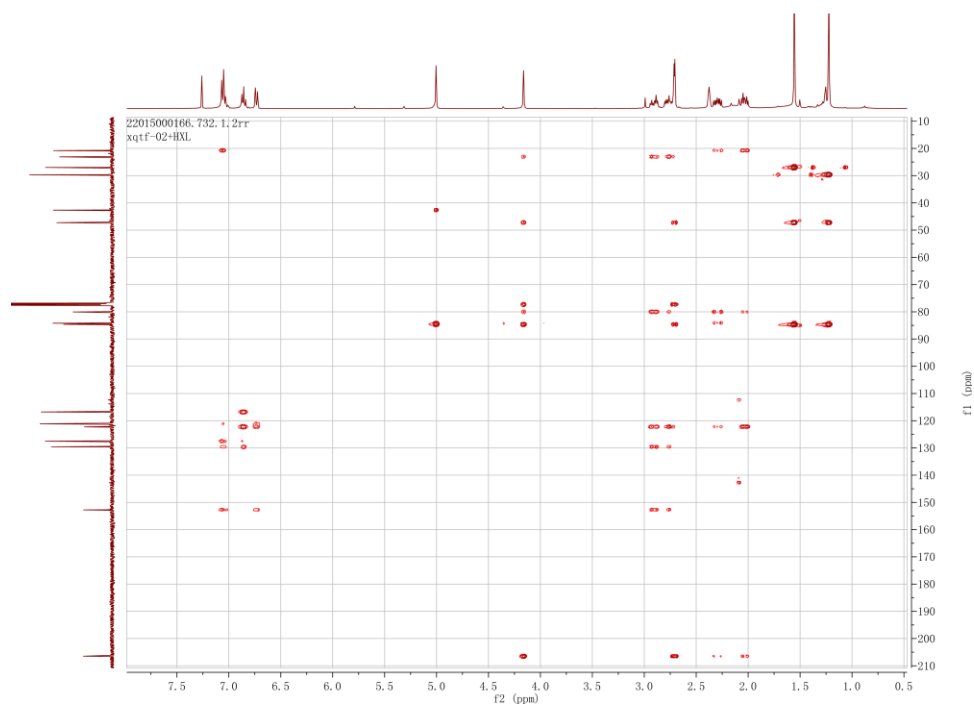

Figure S13 HMBC spectrum (CDCl<sub>3</sub>, 400 MHz) of 1a

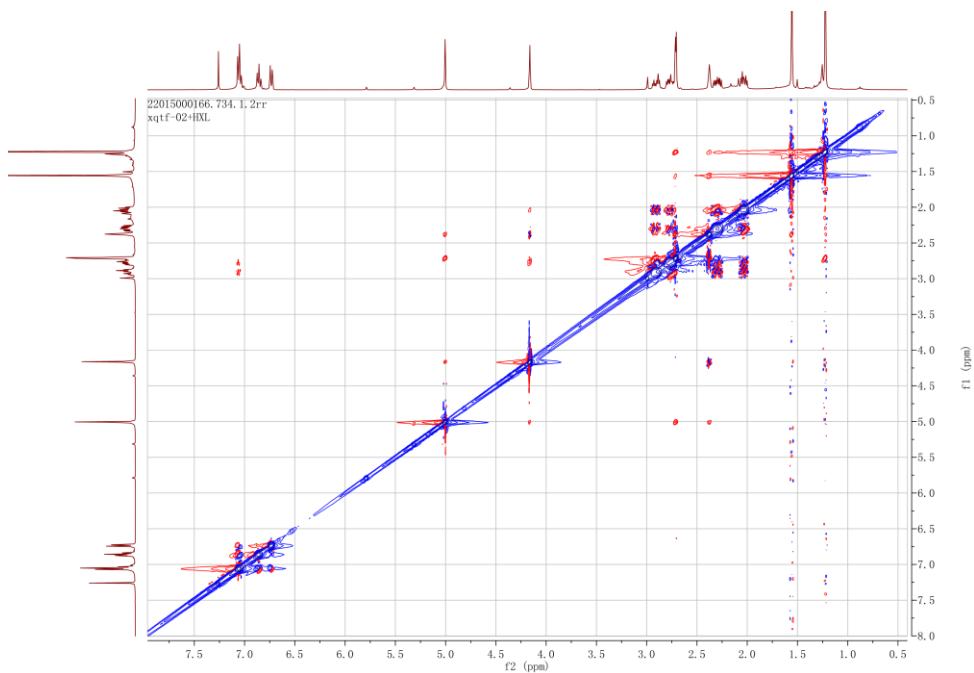

Figure S14 ROESY spectrum (CDCl<sub>3</sub>, 400 MHz) of 1a

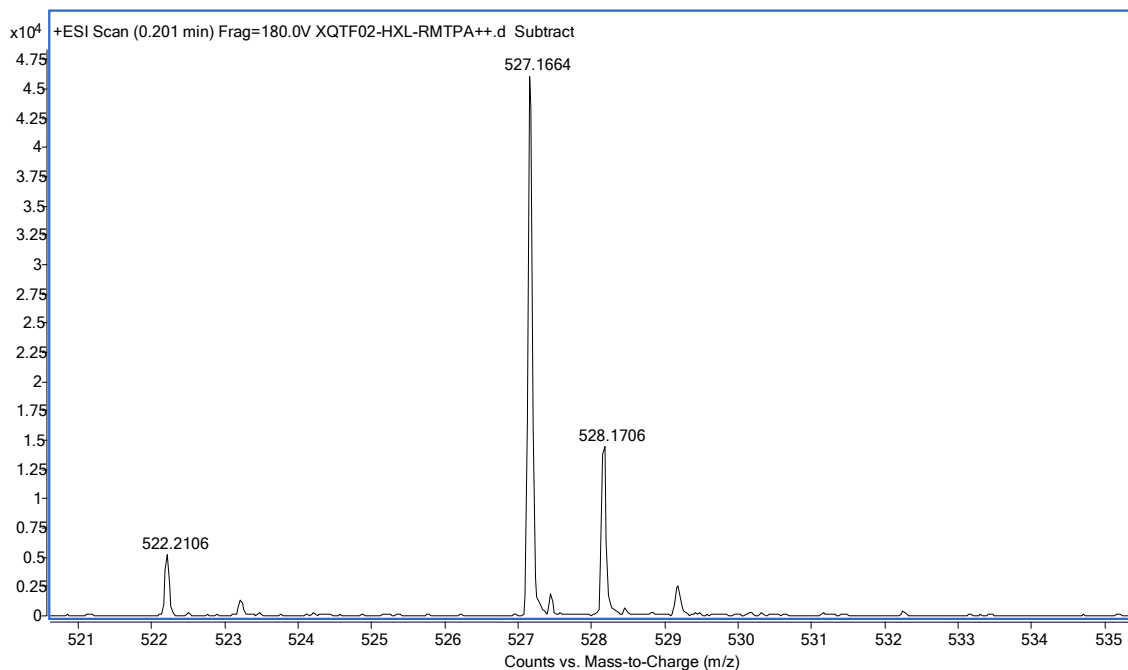

Figure S15 HRESIMS spectrum of (*R*)-MTPA ester of 1a

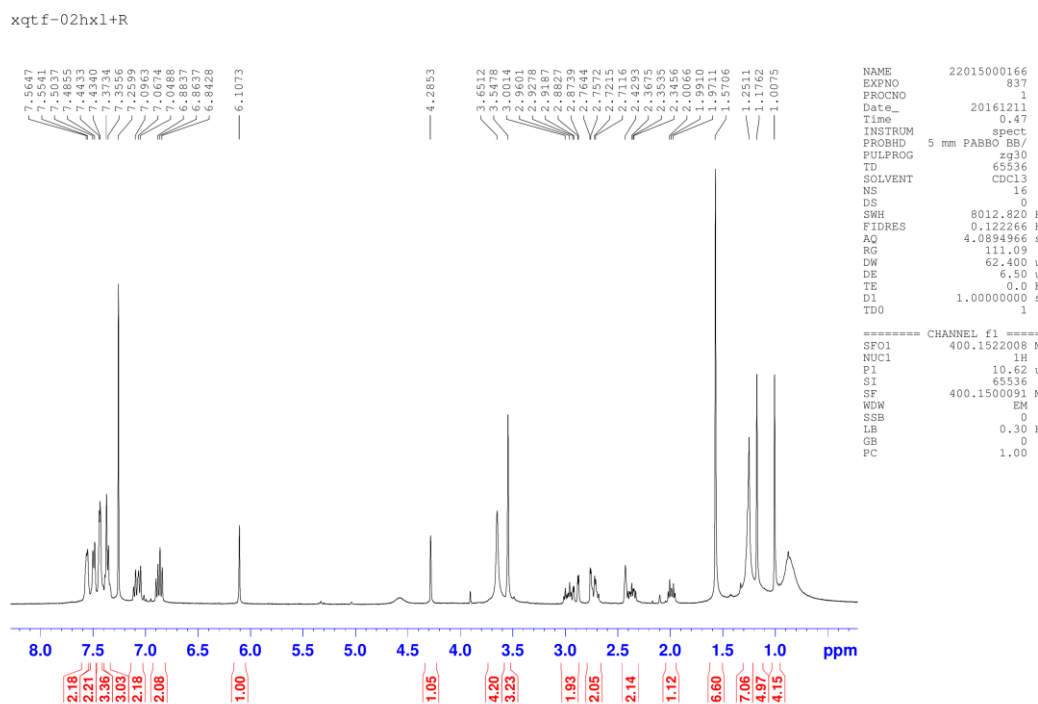

Figure S16 <sup>1</sup>H NMR spectrum (CDCl<sub>3</sub>, 400 MHz) of (*R*)-MTPA ester of 1a

xqtf-02hx1+R

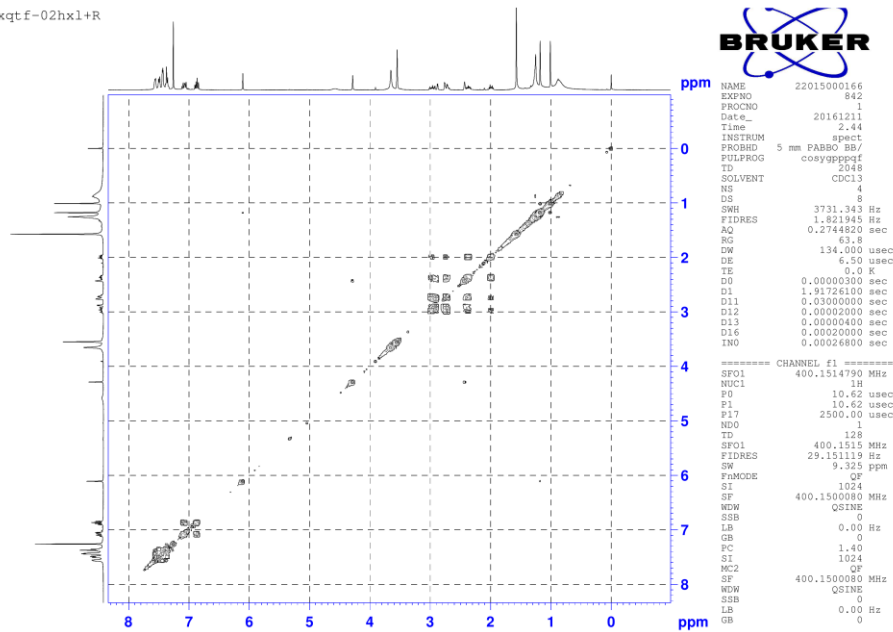

Figure S17  $^1\text{H}$ - $^1\text{H}$  COSY spectrum ( $\text{CDCl}_3$ , 400 MHz) of (*R*)-MTPA ester of 1a

xqtf-02hx1+R

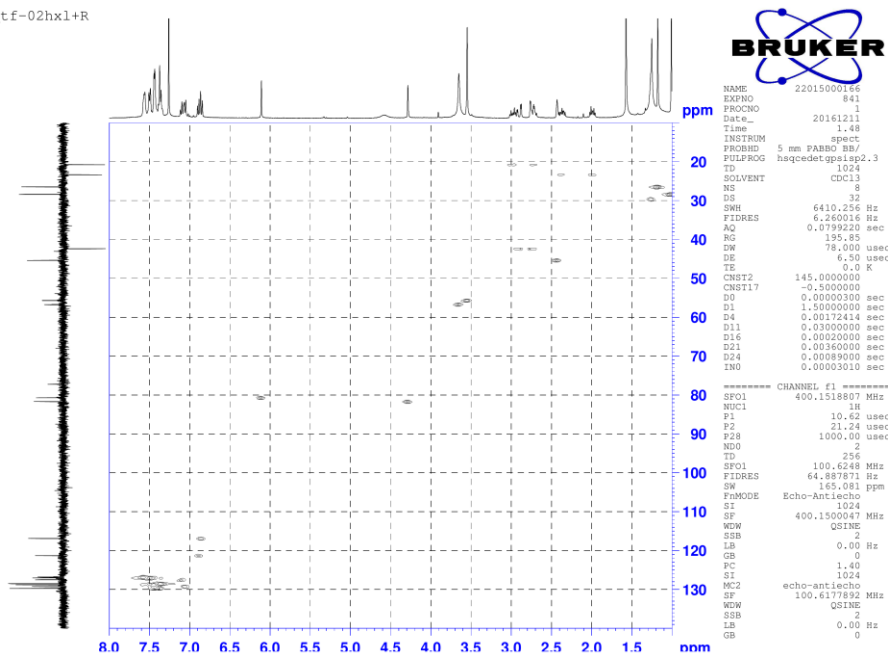

Figure S18 HSQC spectrum ( $\text{CDCl}_3$ , 400 MHz) of (*R*)-MTPA ester of 1a

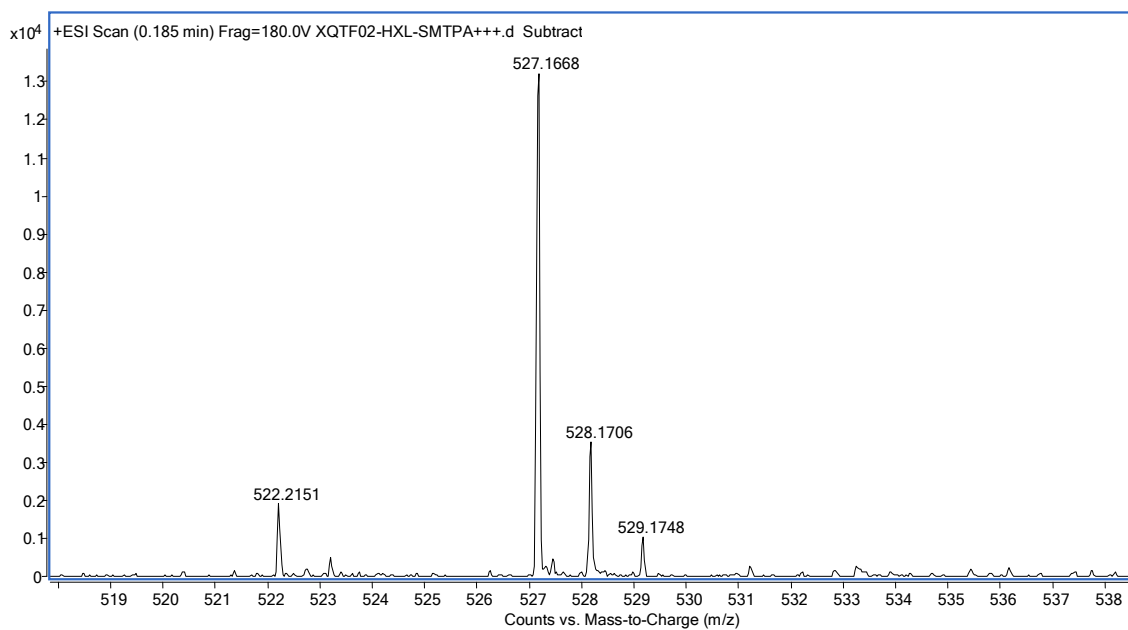

Figure S19 HRESIMS spectrum of (*S*)-MTPA ester of **1a**

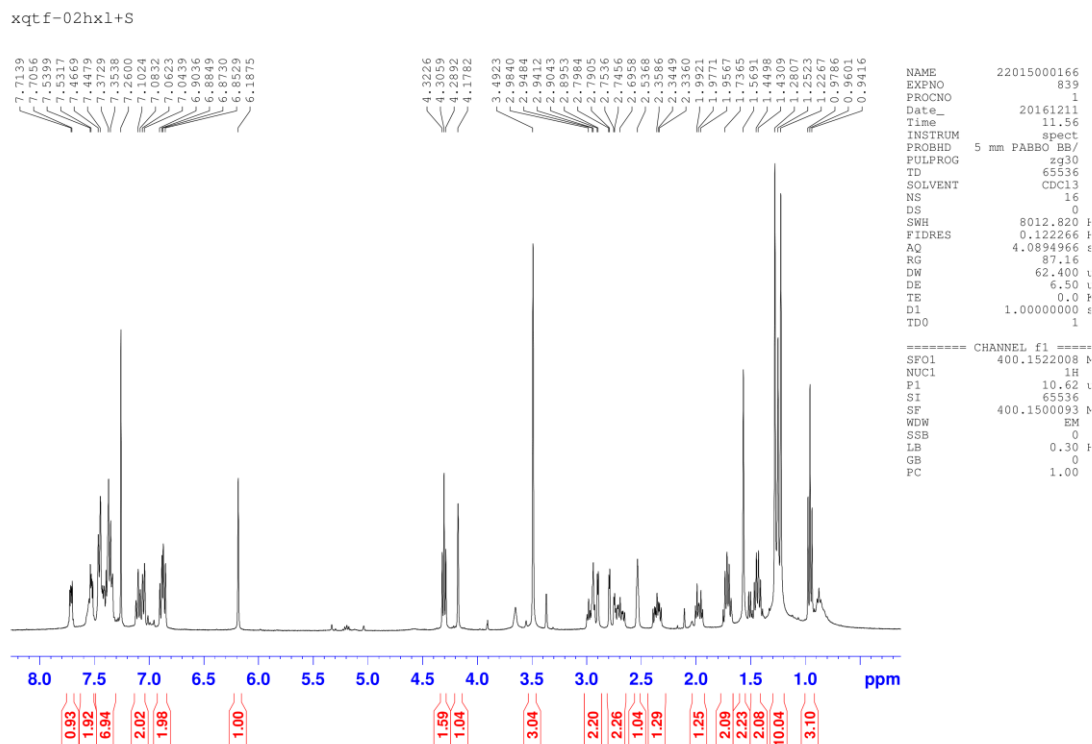

Figure S20 <sup>1</sup>H-NMR spectrum (CDCl<sub>3</sub>, 400 MHz) of (*S*)-MTPA ester of **1a**

xqtf-02hx1+S

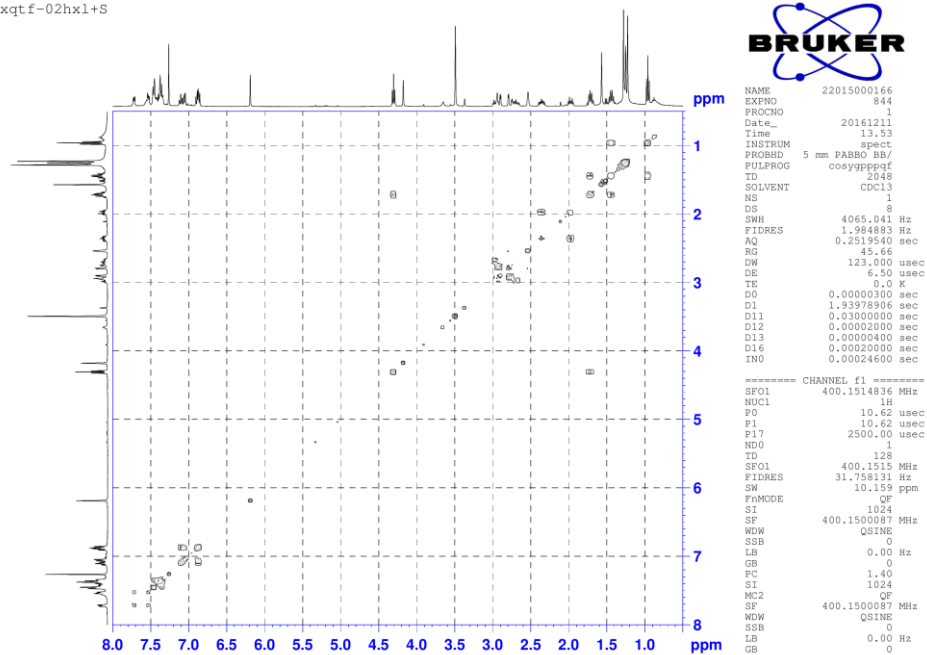

Figure S21  $^1\text{H}$ - $^1\text{H}$  COSY spectrum ( $\text{CDCl}_3$ , 400 MHz) of (*S*)-MTPA ester of 1a

xqtf-02hx1+S

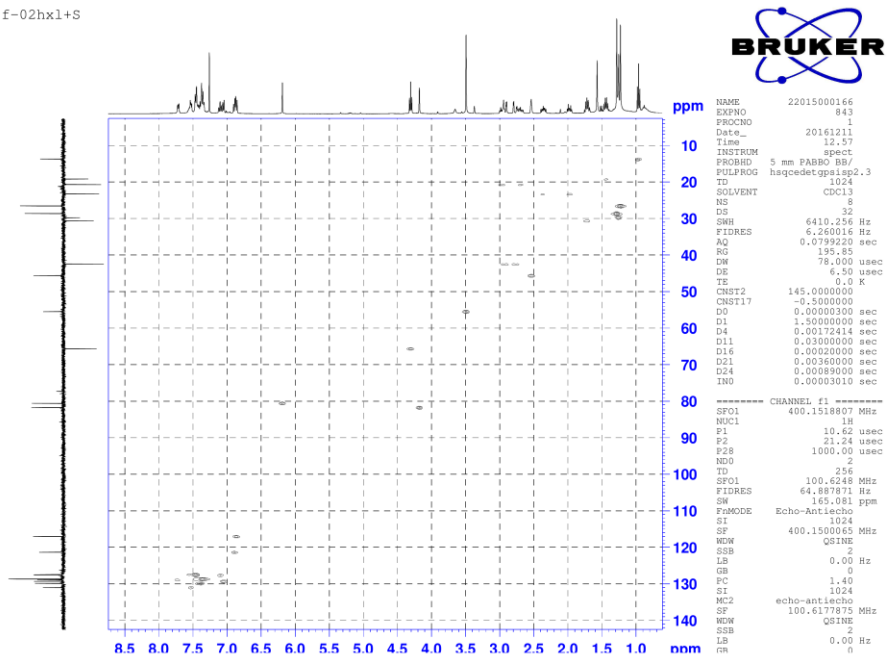

Figure S22 ROESY spectrum ( $\text{CDCl}_3$ , 400 MHz) of (*S*)-MTPA ester of 1a

## User Spectra

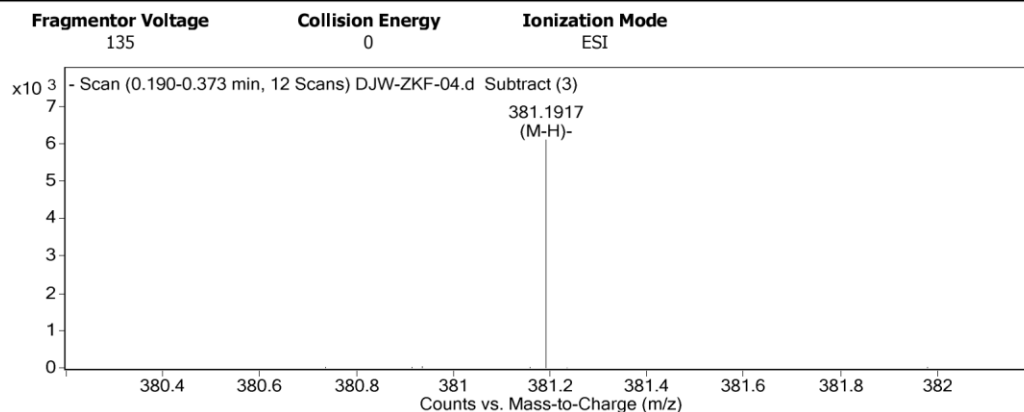

### Formula Calculator Results

| Formula                                        | CalculatedMass | CalculatedMz | Mz       | Diff. (mDa) | Diff. (ppm) | DBE    |
|------------------------------------------------|----------------|--------------|----------|-------------|-------------|--------|
| C <sub>20</sub> H <sub>30</sub> O <sub>7</sub> | 382.1992       | 381.1919     | 381.1917 | 0.1         | 0.2         | 6.0000 |

Figure S23 HRESIMS spectrum of dimericilligerate F (2)

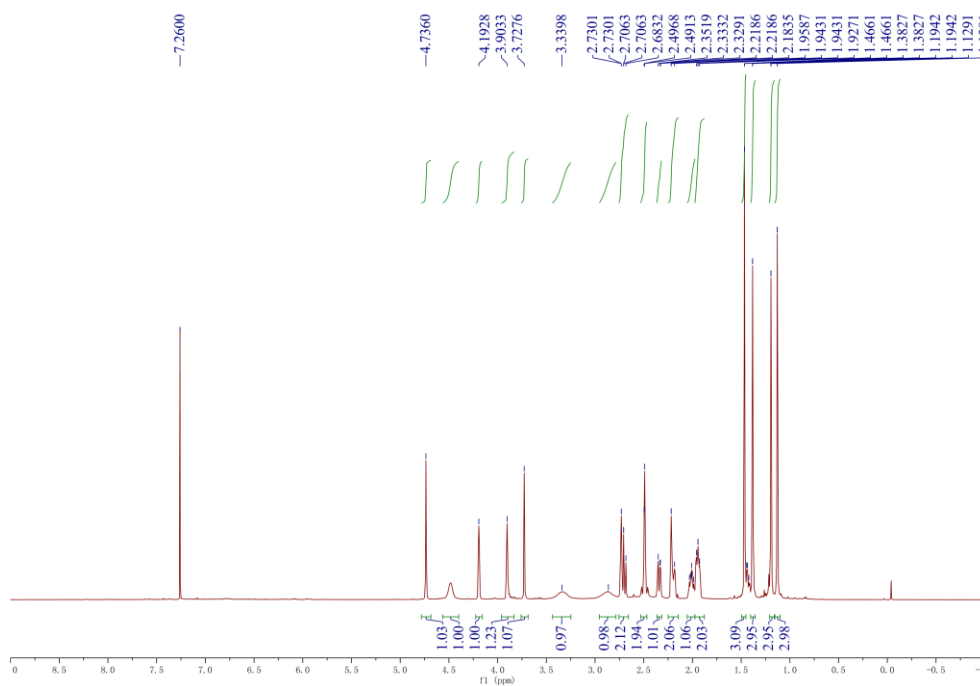

Figure S24 <sup>1</sup>H-NMR spectrum (CDCl<sub>3</sub>, 600 MHz) of dimericilligerate F (2)

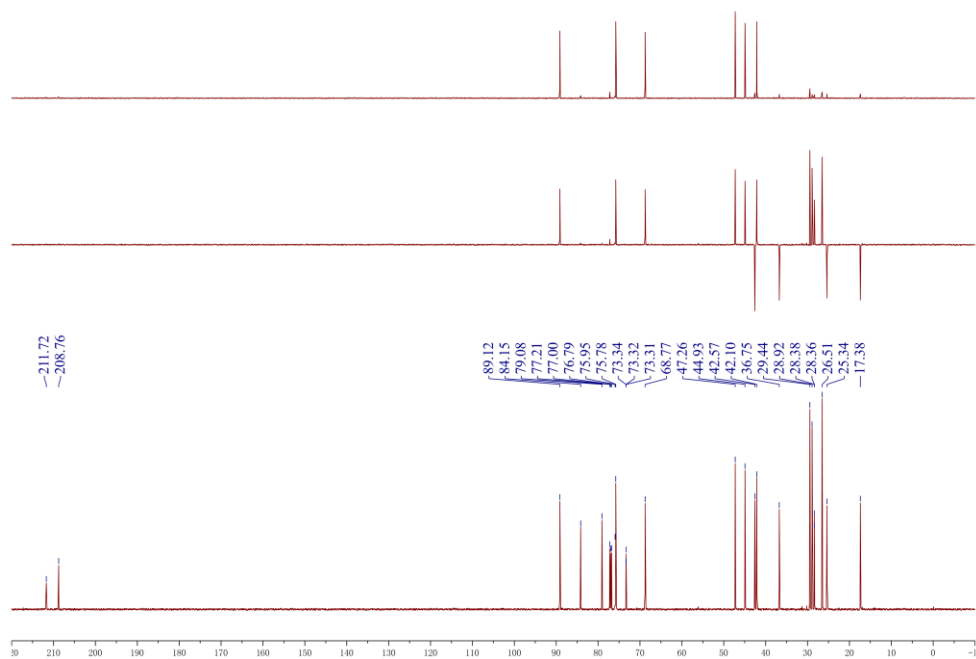

Figure S25  $^{13}\text{C}$ -NMR and DEPT spectra ( $\text{CDCl}_3$ , 150 MHz) of dimericilligerate F (2)

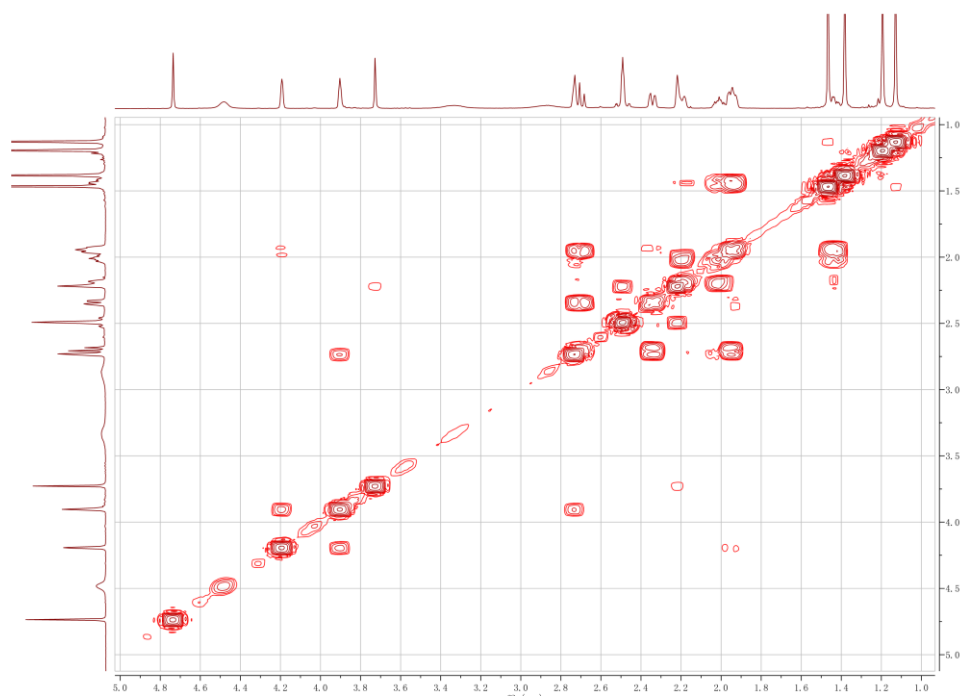

Figure S26  $^1\text{H}$ - $^1\text{H}$  COSY spectrum ( $\text{CDCl}_3$ , 600 MHz) of dimericilligerate F (2)

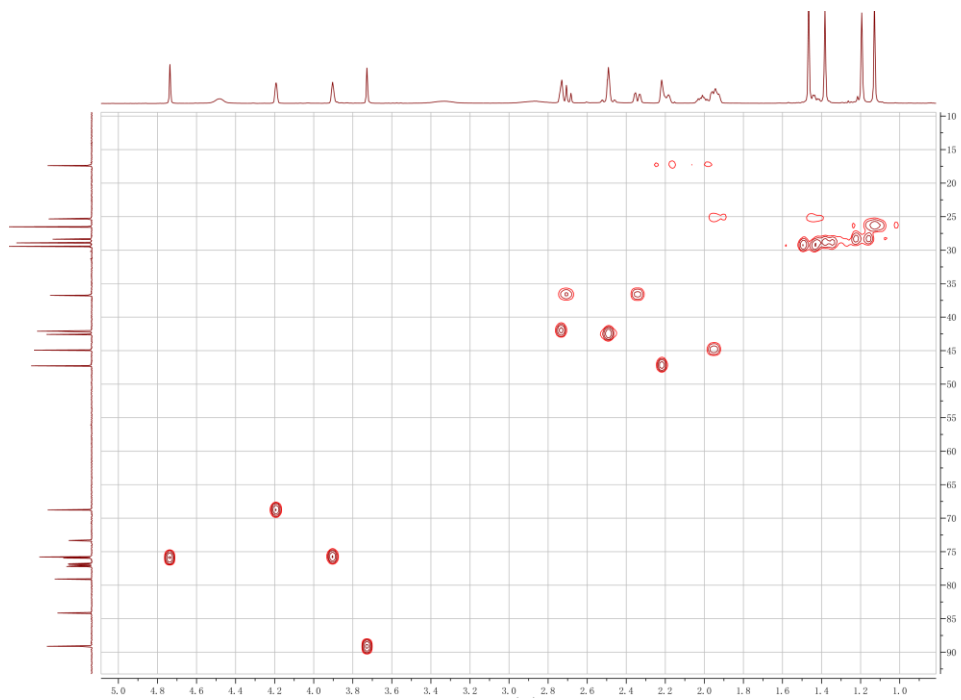

**Figure S27 HSQC spectrum (CDCl<sub>3</sub>, 600 MHz) of dimericilligerate F (2)**

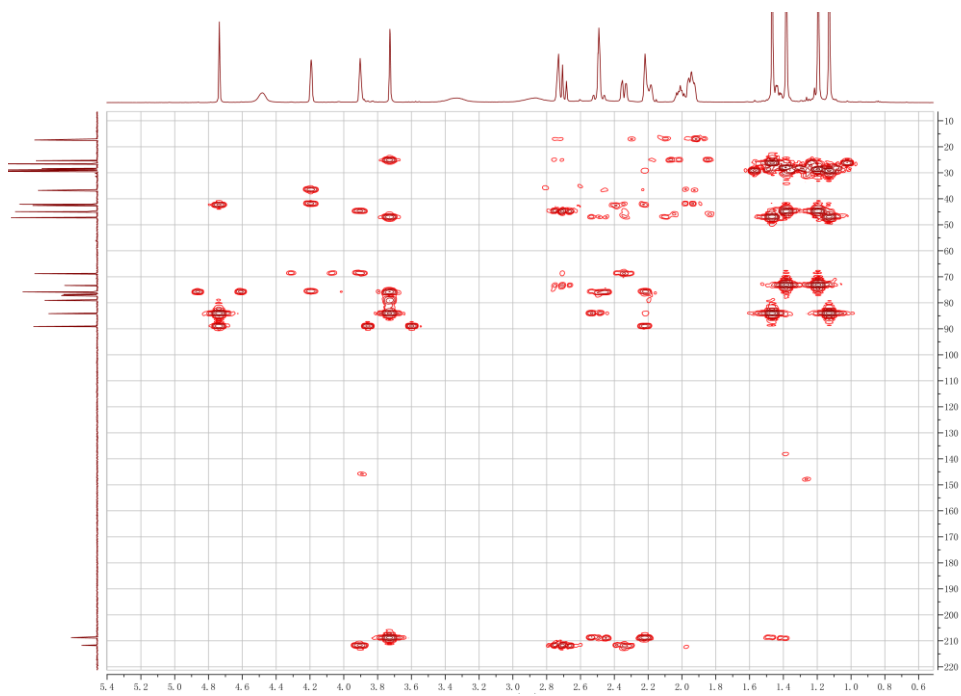

**Figure S28 HMBC spectrum (CDCl<sub>3</sub>, 600 MHz) of dimericilligerate F (2)**



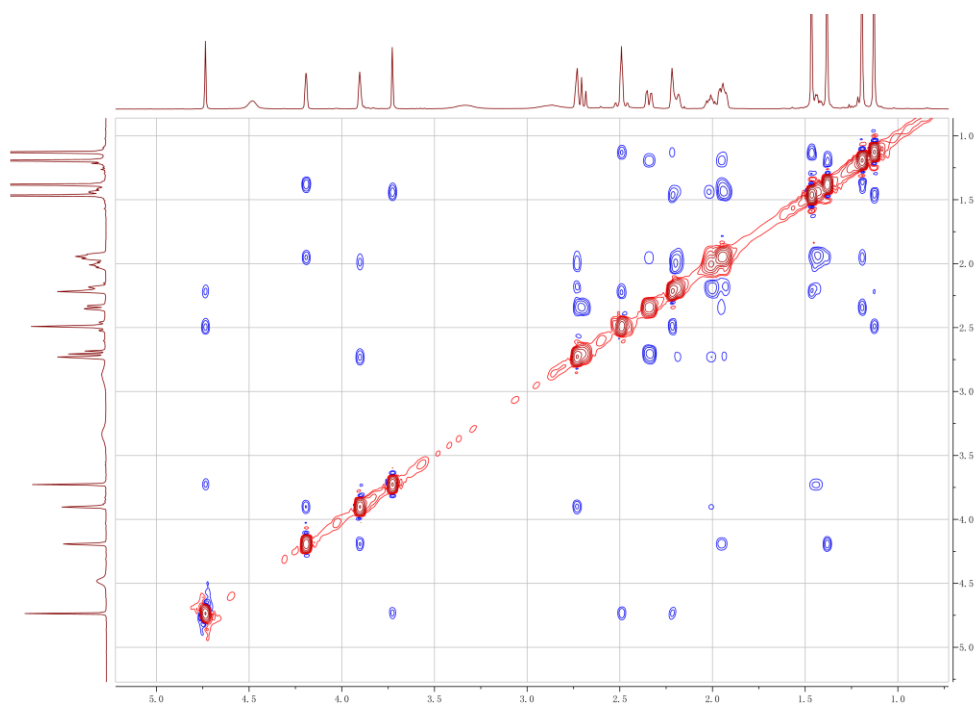

**Figure S29** NOESY spectrum (CDCl<sub>3</sub>, 600 MHz) of dimericilligerate F (2)

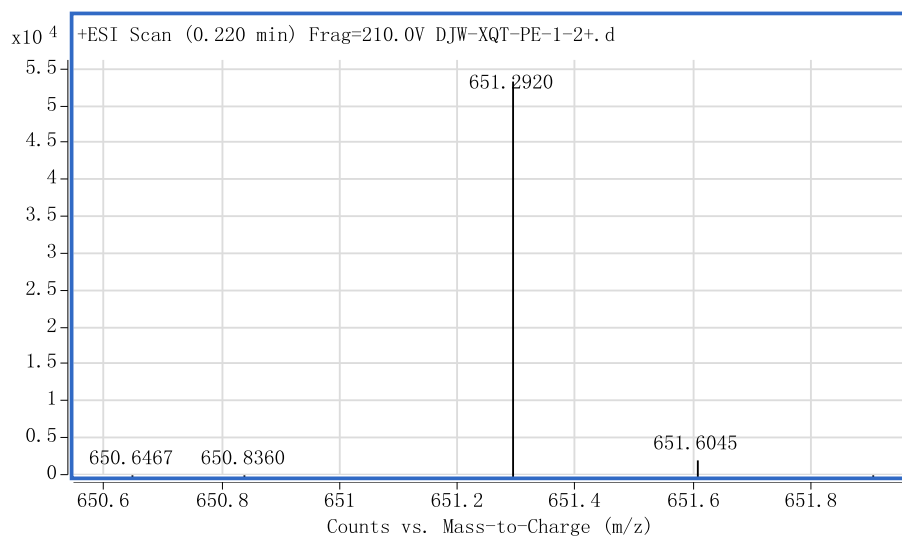

**Figure S30** HRESIMS spectrum of dimericilligerate A (3)

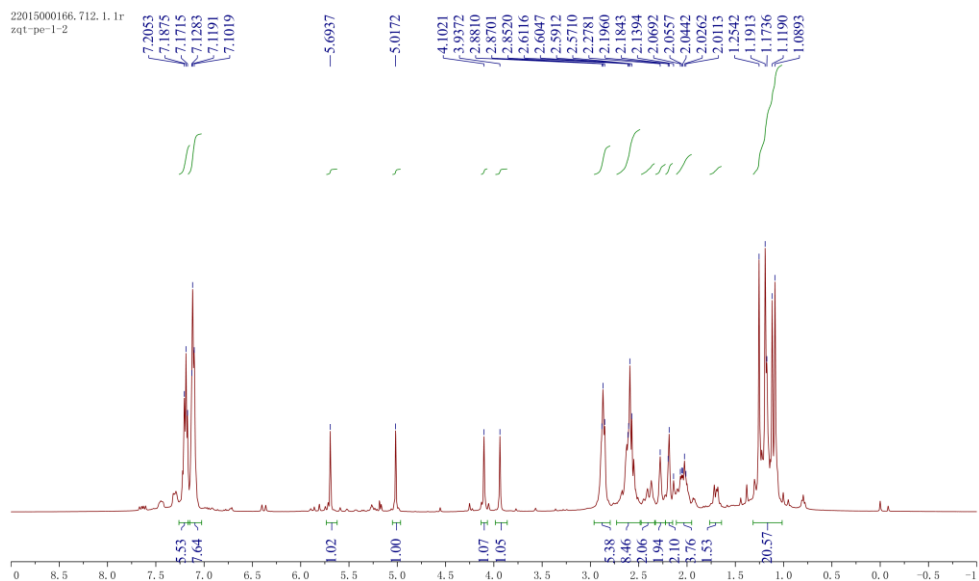

Figure S31  $^1\text{H}$  NMR spectrum ( $\text{CDCl}_3$ , 400 MHz) of dimericilligerate A (3)

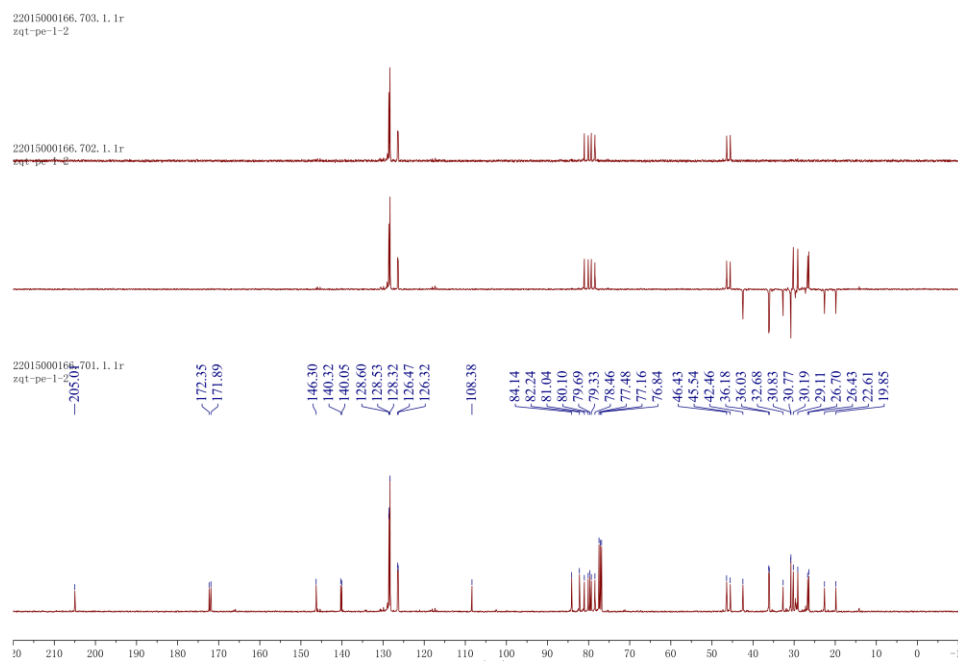

Figure S32  $^{13}\text{C}$  NMR and DEPT spectra ( $\text{CDCl}_3$ , 100 MHz) of dimericilligerate A (3)

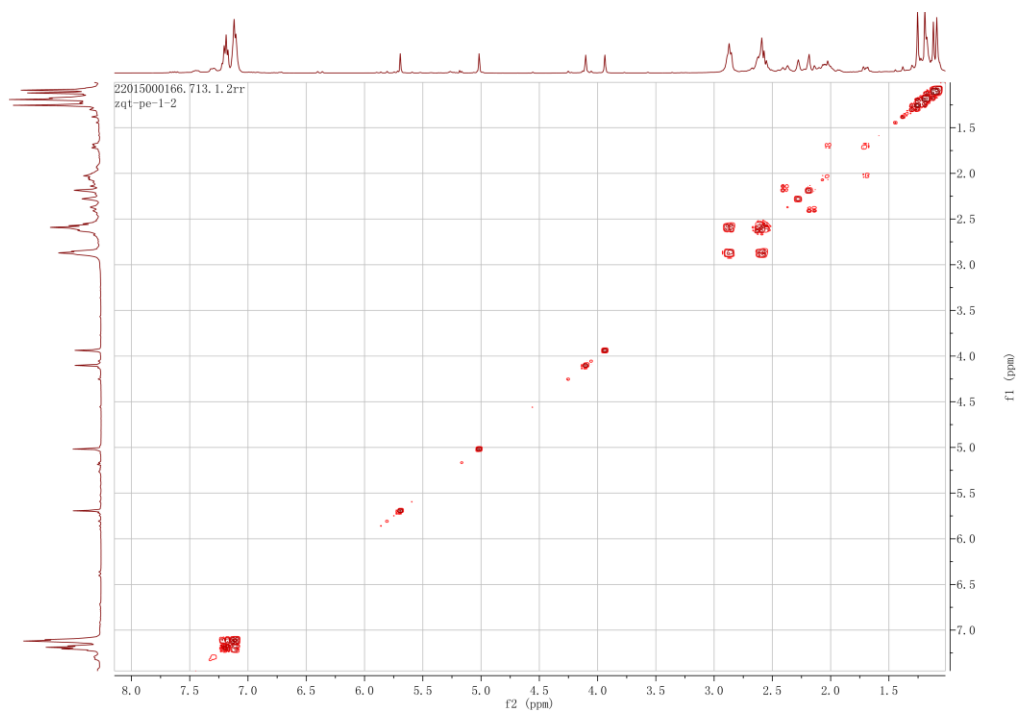

**Figure S33  $^1\text{H}$ - $^1\text{H}$  COSY spectrum ( $\text{CDCl}_3$ , 400 MHz) of dimericilligerate A (3)**

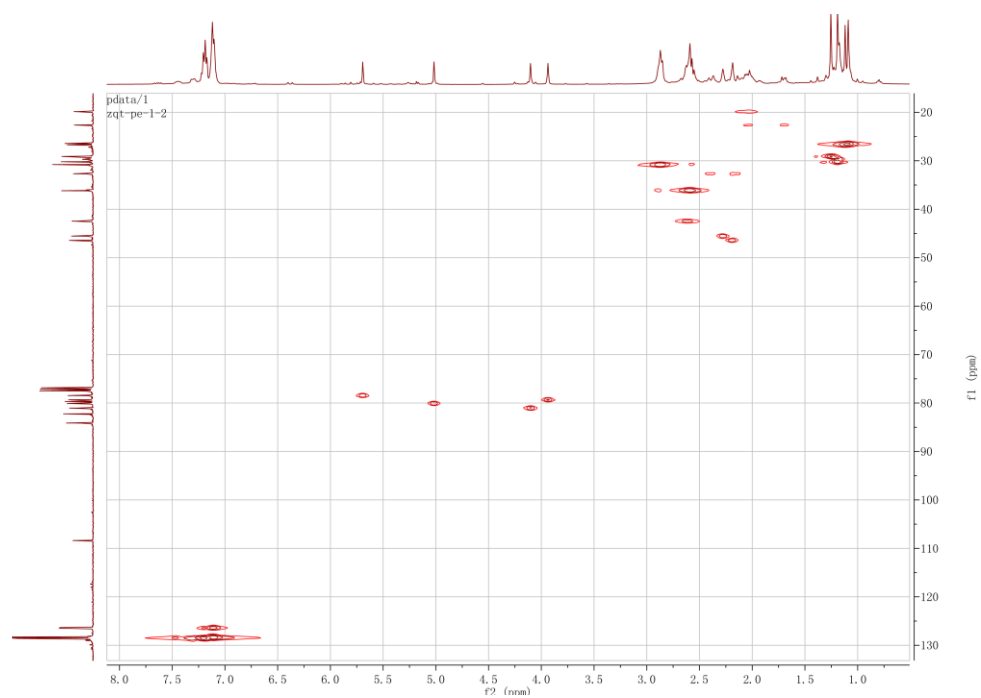

**Figure S34 HSQC spectrum ( $\text{CDCl}_3$ , 400 MHz) of dimericilligerate A (3)**

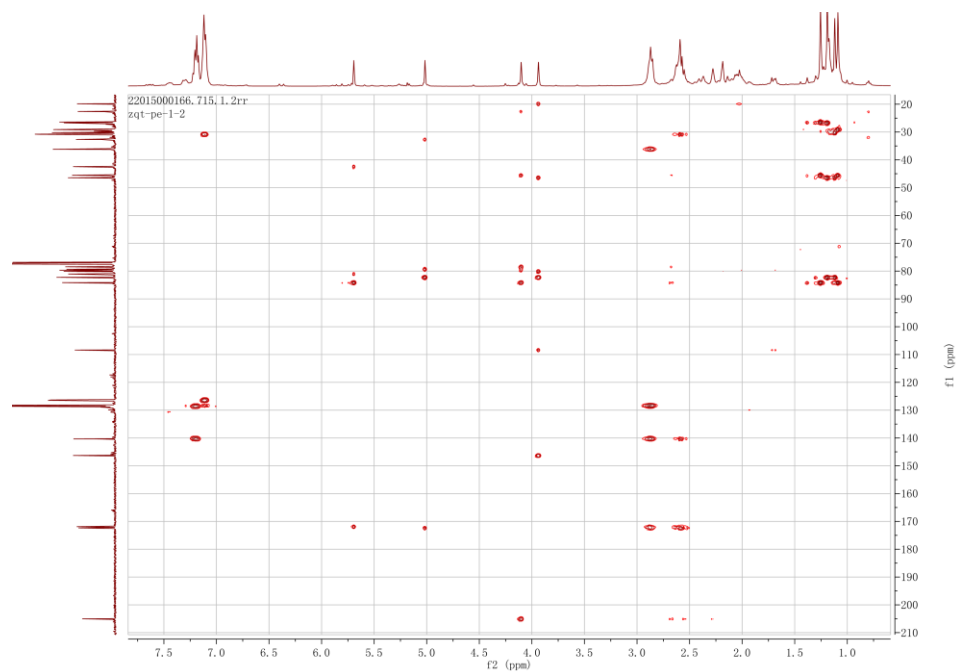

**Figure S35 HMBC spectrum (CDCl<sub>3</sub>, 400 MHz) of dimericilligerate A (3)**

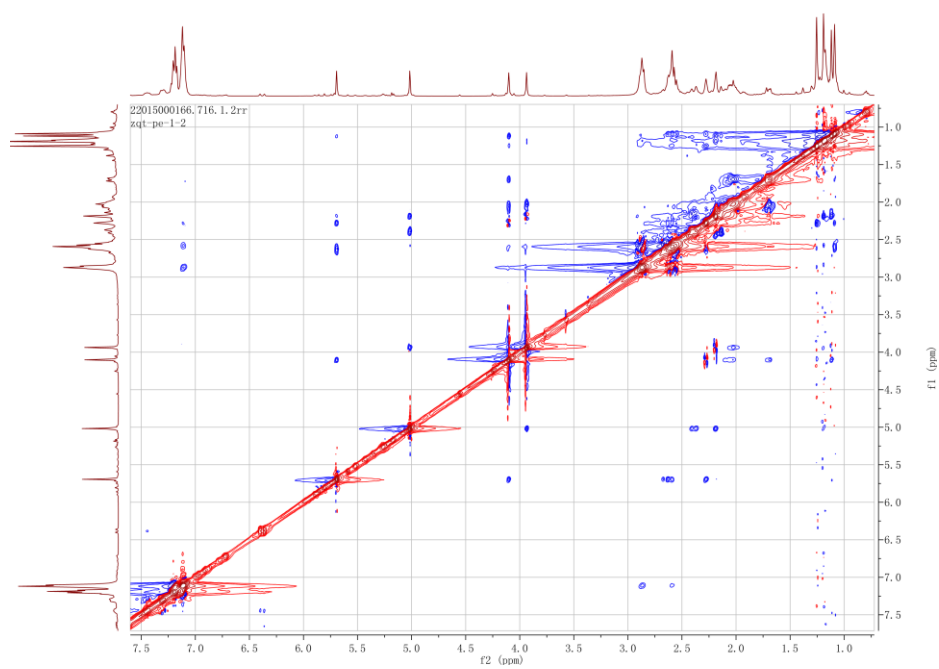

**Figure S36 ROESY spectrum (CDCl<sub>3</sub>, 400 MHz) of dimericilligerate A (3)**

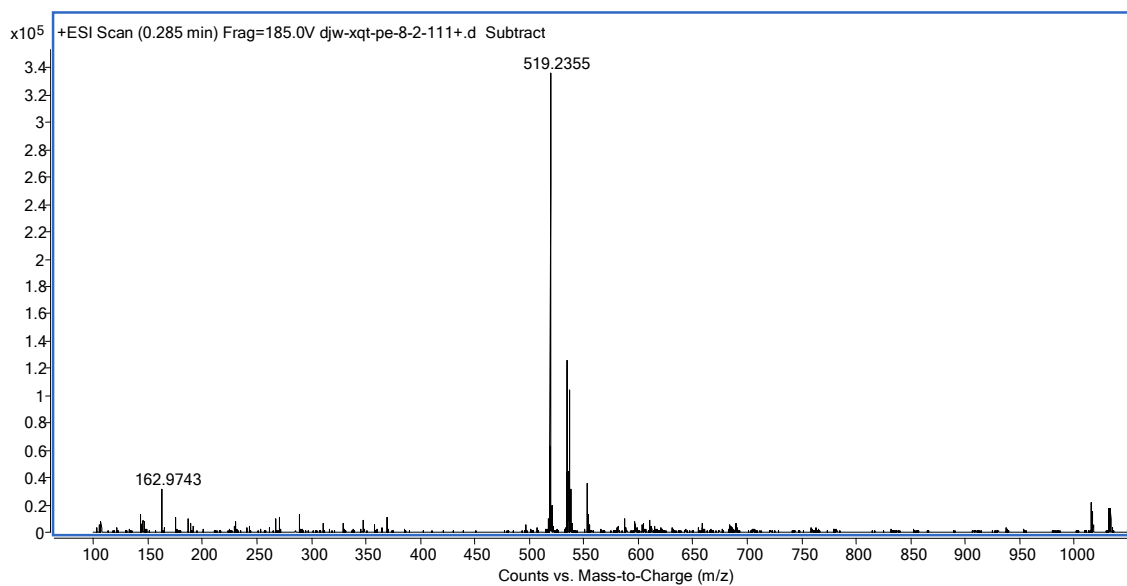

Figure S37 HRESIMS spectrum of dimericilligerate B (4)

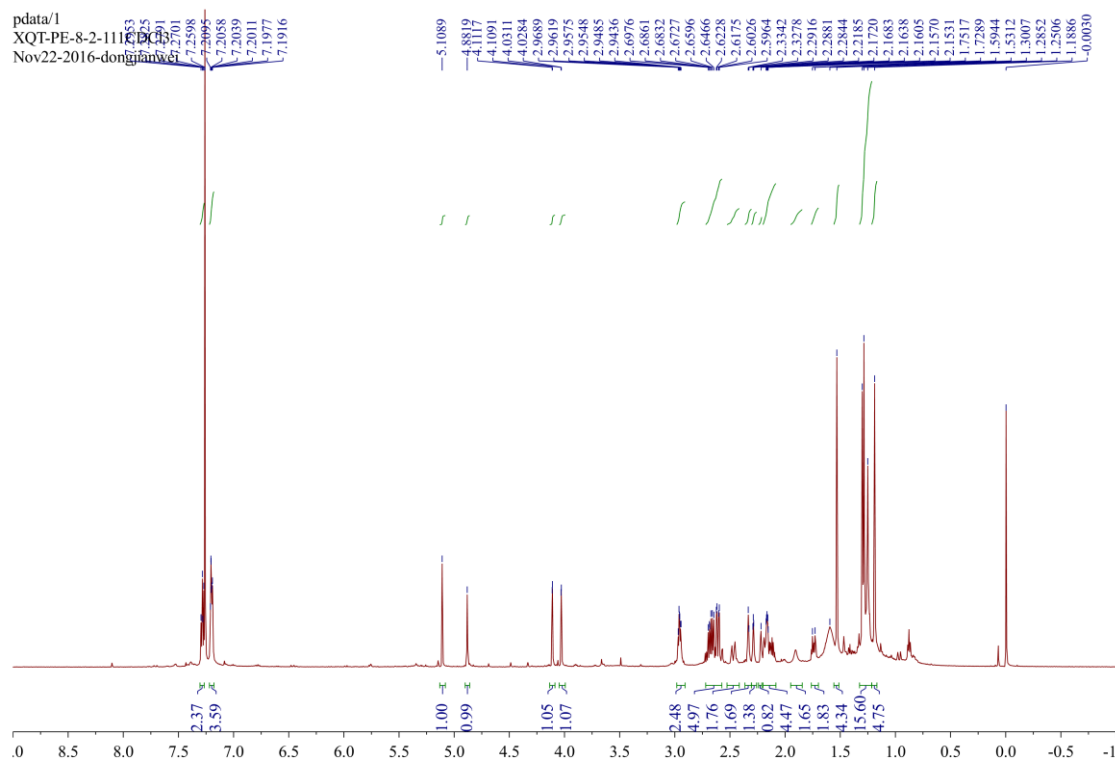

Figure S38  $^1\text{H}$  NMR spectrum ( $\text{CDCl}_3$ , 600 MHz) of dimericilligerate B (4)

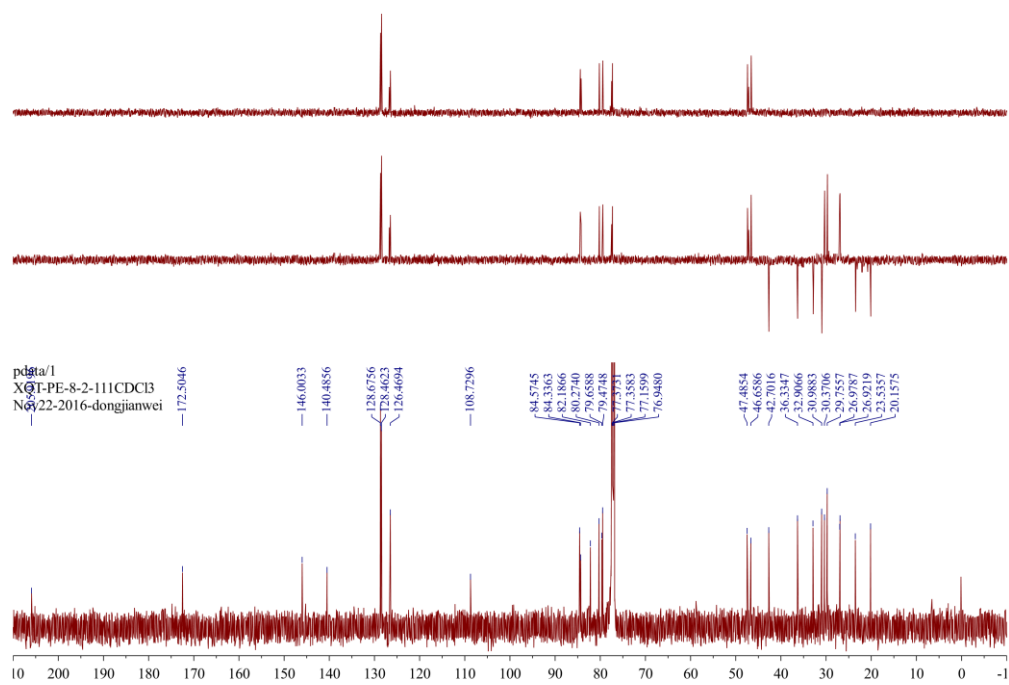

Figure S39  $^{13}\text{C}$  NMR and DEPT spectra ( $\text{CDCl}_3$ , 150 MHz) of dimericilligerate B (4)

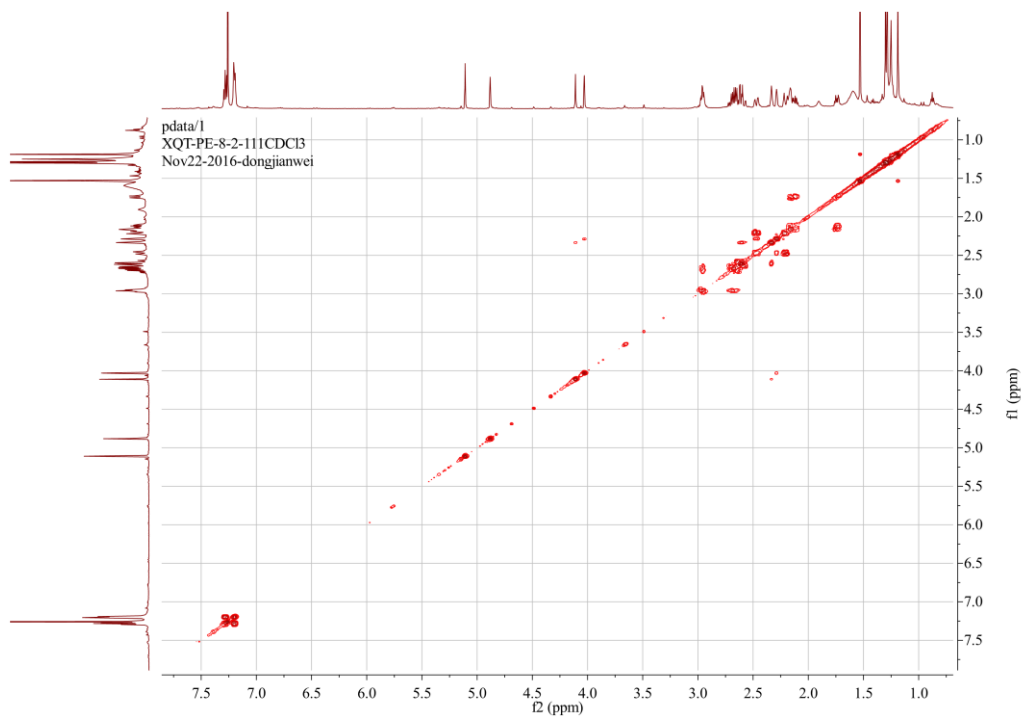

Figure S40  $^1\text{H}$ - $^1\text{H}$  COSY spectrum ( $\text{CDCl}_3$ , 600 MHz) of dimericilligerate B (4)

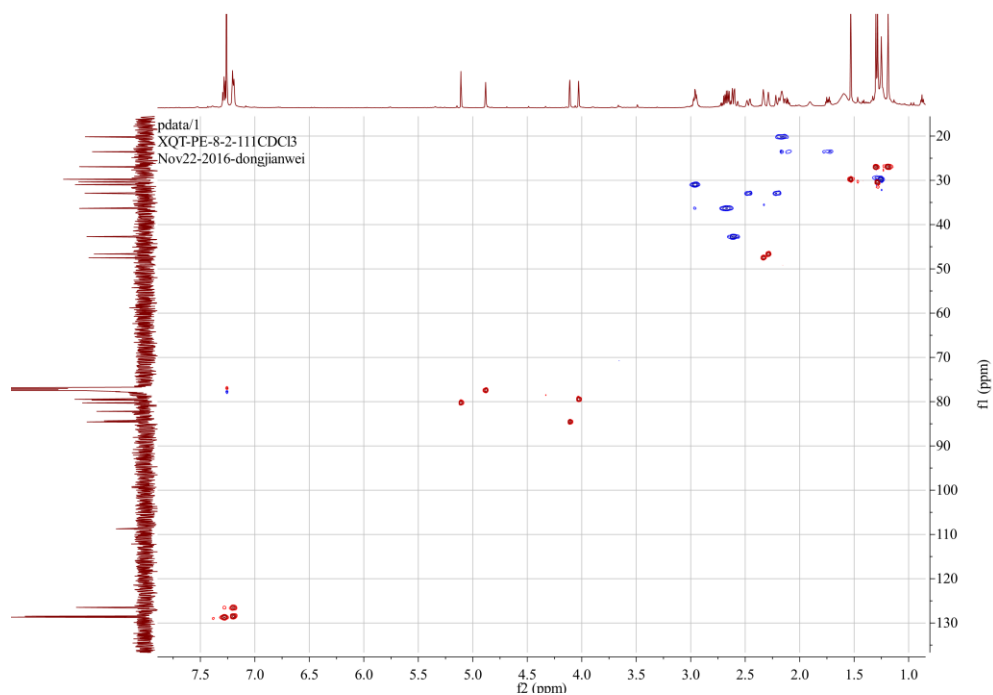

Figure S41 HSQC spectrum (CDCl<sub>3</sub>, 600 MHz) of dimericilligerate B (4)

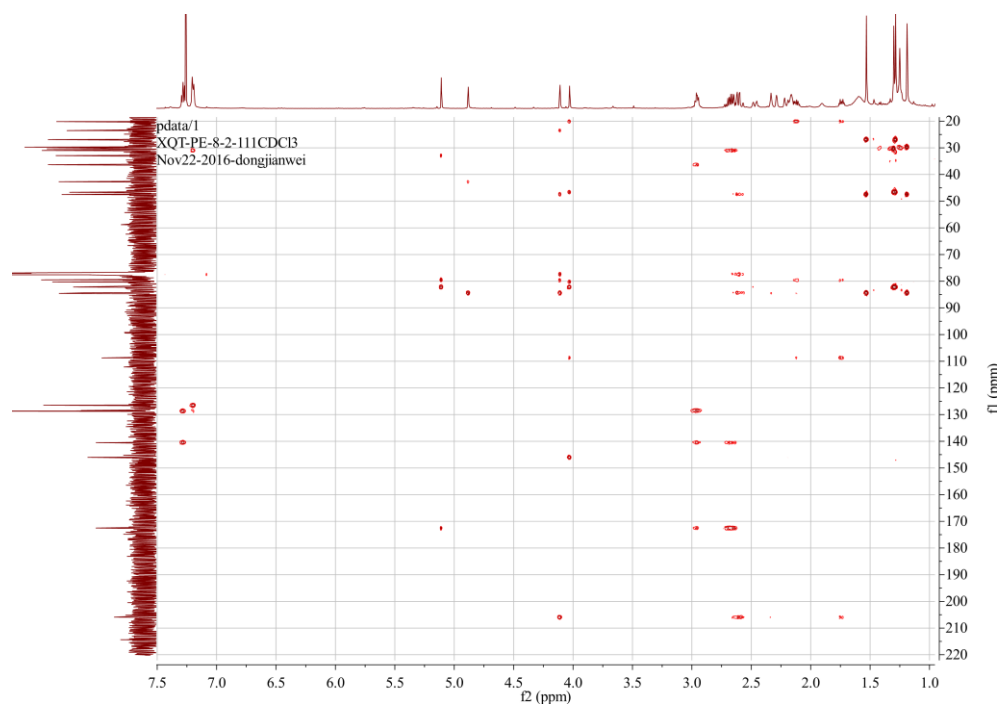

Figure S42 HMBC spectrum (CDCl<sub>3</sub>, 600 MHz) of dimericilligerate B (4)

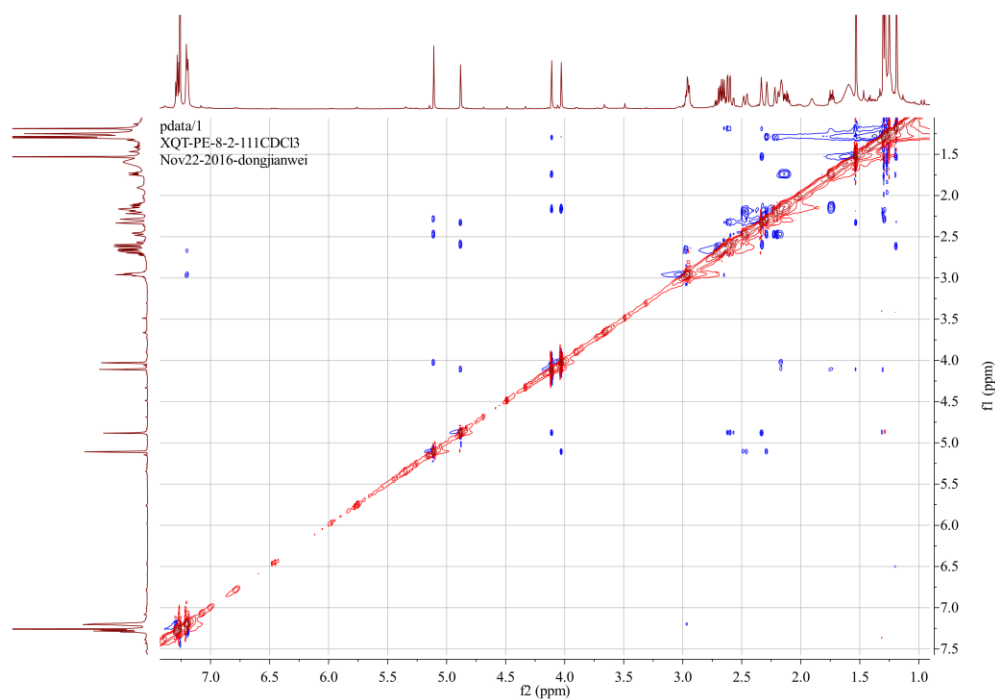

**Figure S43 ROESY spectrum (CDCl<sub>3</sub>, 600 MHz) of dimericilligerate B (4)**

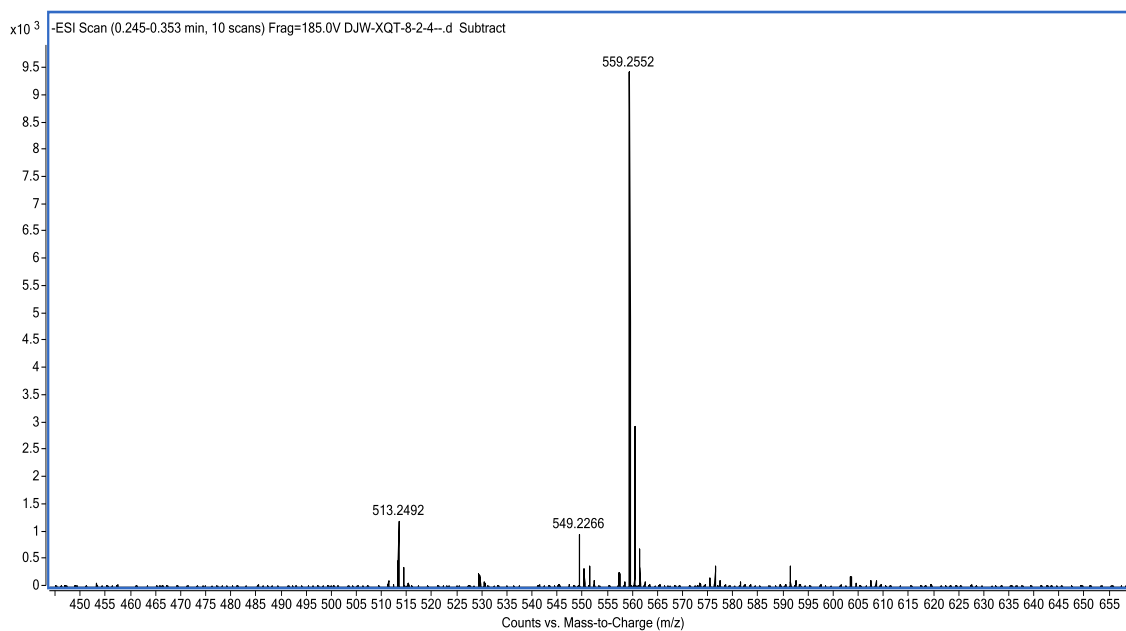

**Figure S44 HRESIMS spectrum of dimericilligerate C (5)**



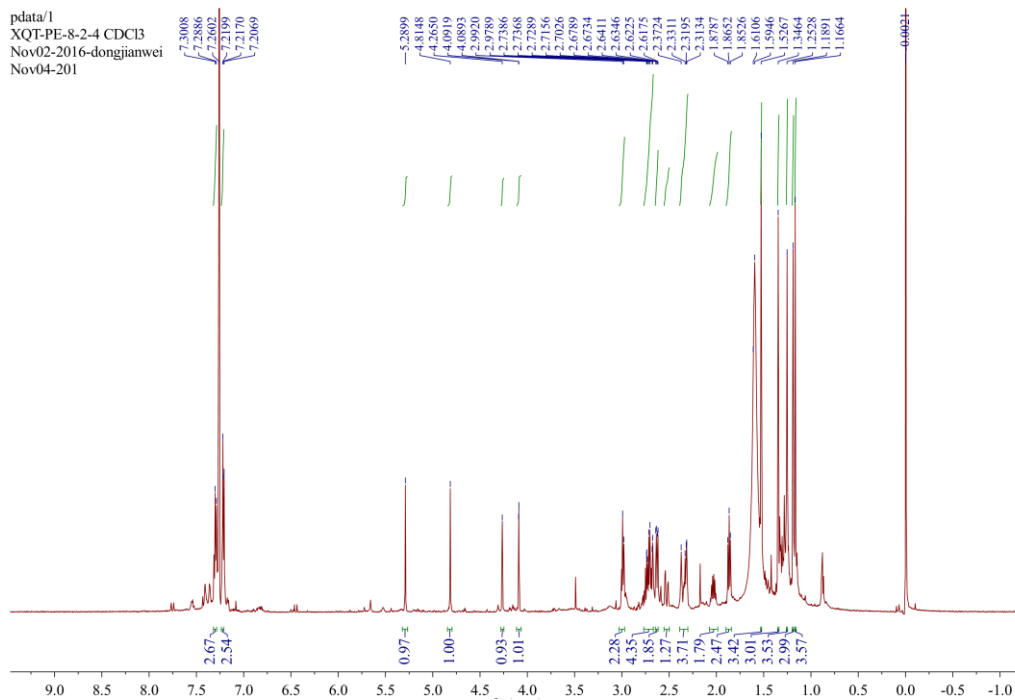

Figure S45  $^1\text{H}$  NMR spectrum ( $\text{CDCl}_3$ , 600 MHz) of dimericilligerate C (5)

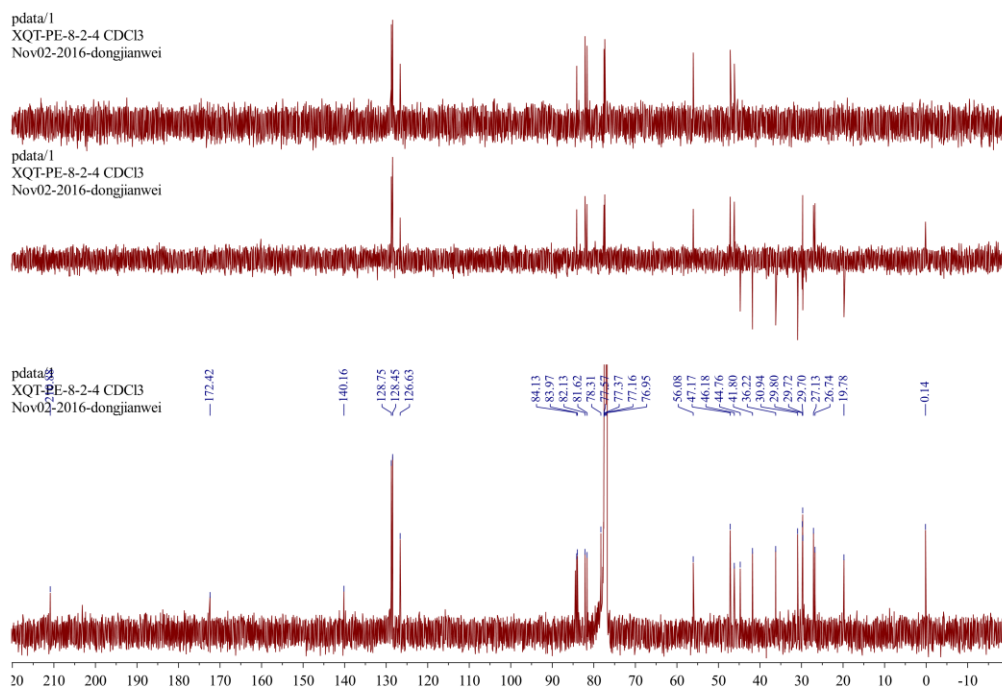

Figure S46  $^{13}\text{C}$  NMR and DEPT spectra ( $\text{CDCl}_3$ , 150 MHz) of dimericilligerate C (5)

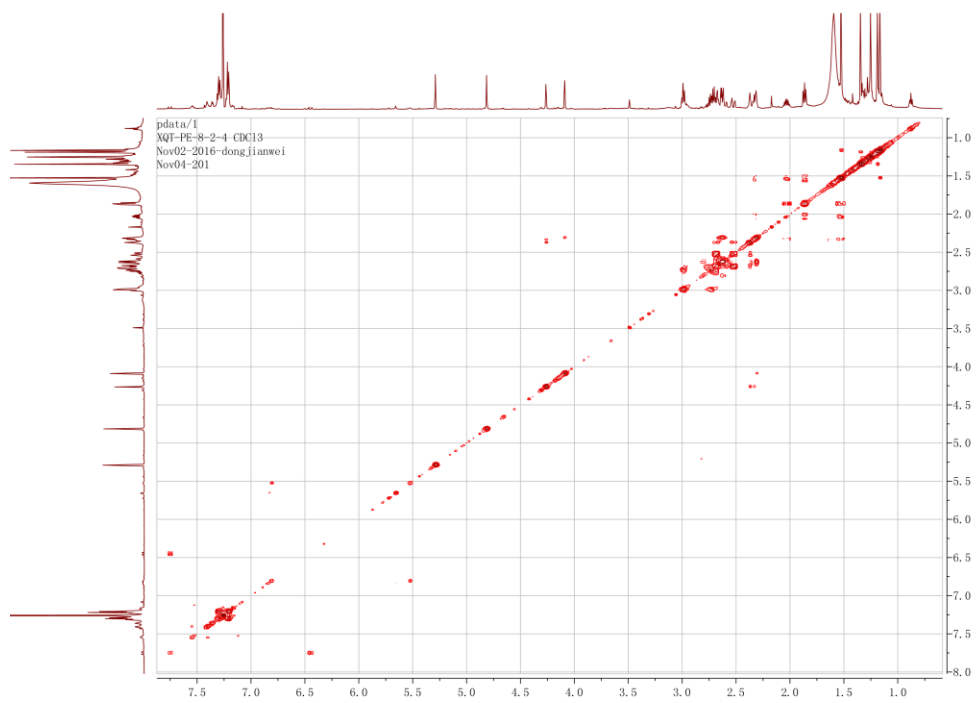

Figure S47  $^1\text{H}$ - $^1\text{H}$  COSY spectrum ( $\text{CDCl}_3$ , 600 MHz) of dimericilligerate C (5)

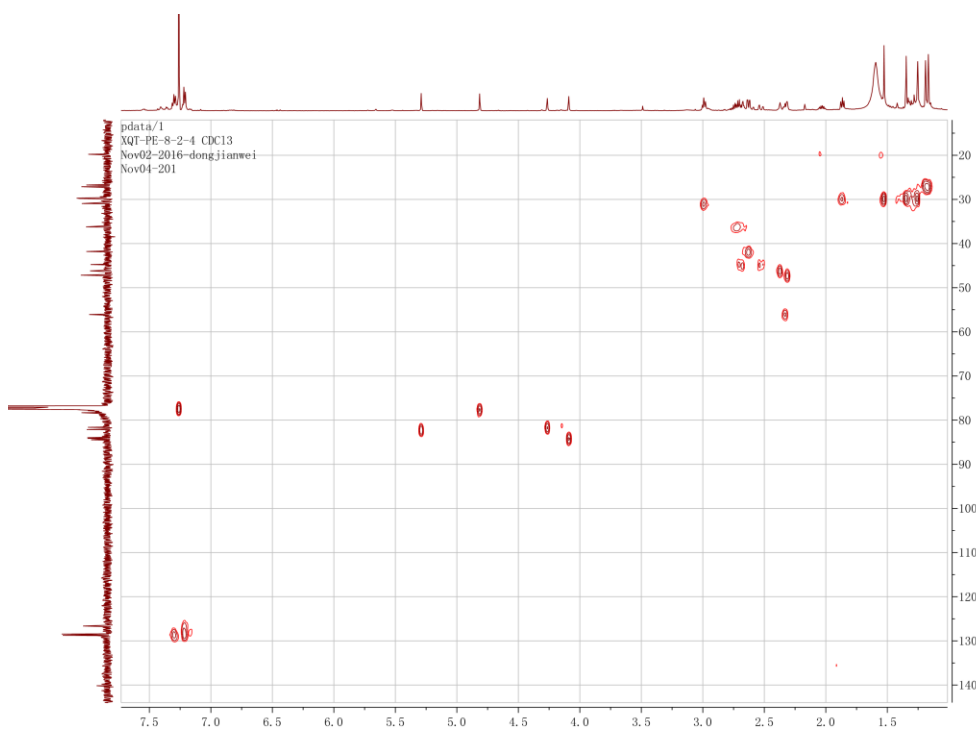

Figure S48 HSQC spectrum ( $\text{CDCl}_3$ , 600 MHz) of dimericilligerate C (5)

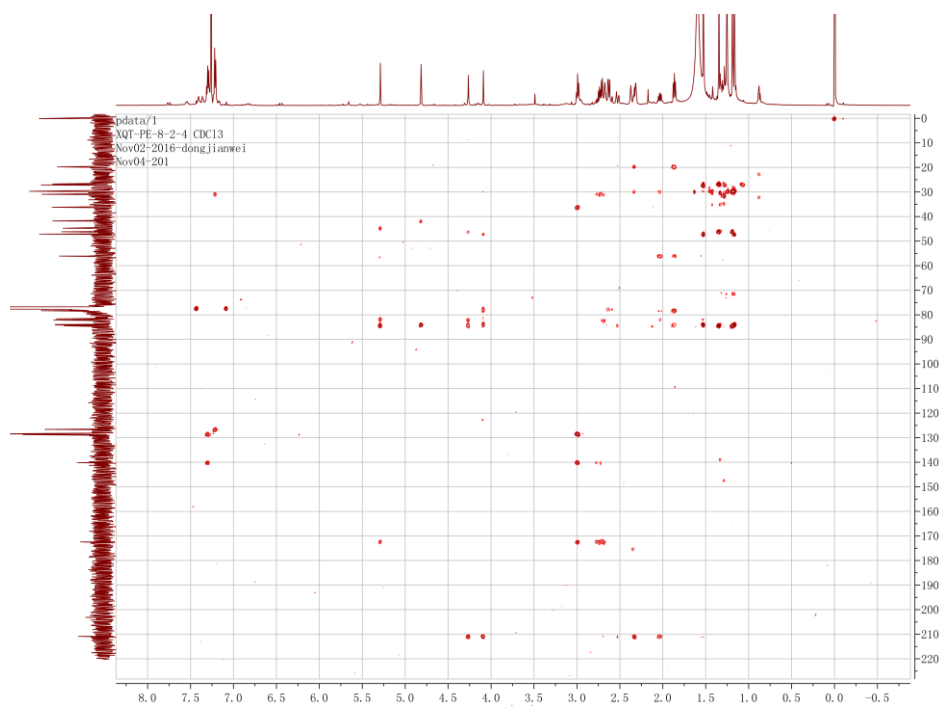

Figure S49 HMBC spectrum (CDCl<sub>3</sub>, 600 MHz) of dimericilligerate C (5)

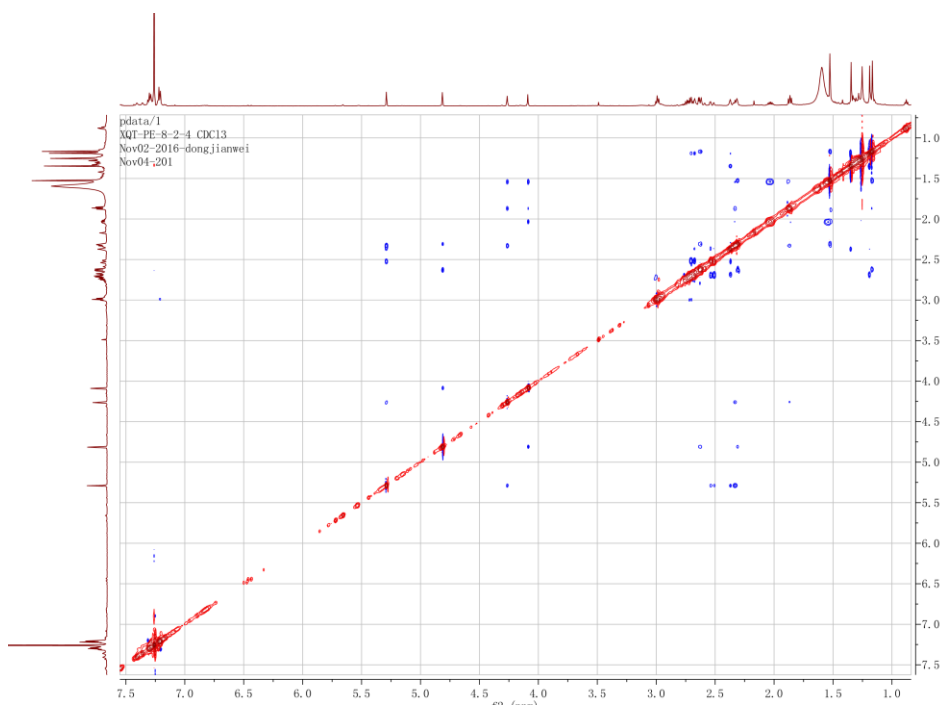

Figure S50 ROESY spectrum (CDCl<sub>3</sub>, 600 MHz) of dimericilligerate C (5)

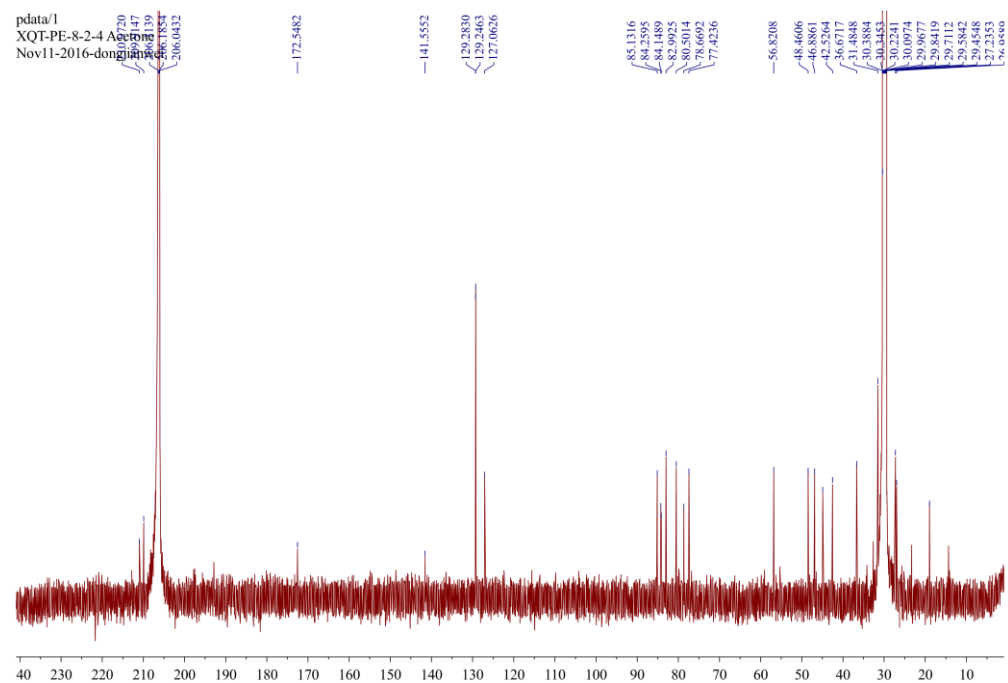

Figure S51  $^{13}\text{C}$  NMR spectrum (acetone- $d_6$ , 150 MHz) of dimericilligerate C (5)

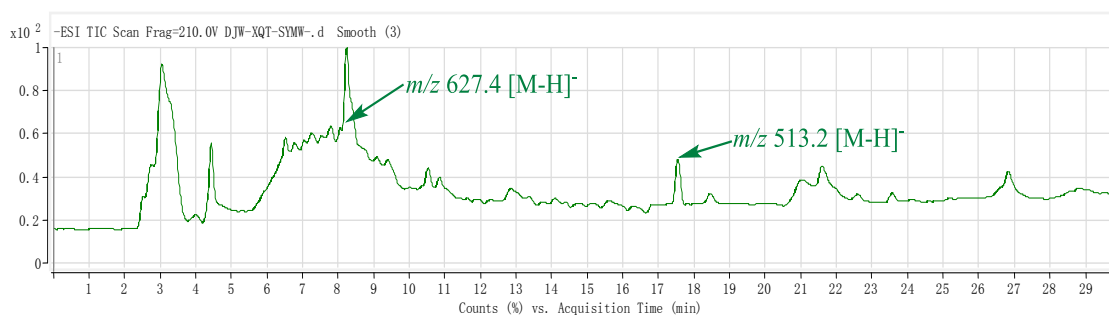

Figure S52 Total ion chromatogram (ESI-) of the petroleum ether extract.
